# Supplementary material
Source: MDPI journal article supplement (https://www.mdpi.com/2227-9717/10/8/1535)
Supplement: s1 [file s1]

# A detailed process and techno-economic analysis of the methanol synthesis from H<sub>2</sub> and CO<sub>2</sub> with intermediate condensation steps

*Bruno Lacerda de Oliveira Campos, Kelechi John, Philipp Beeskow, Karla Herrera Delgado, Stephan Pitter, Nicolaus Dahmen, and Jörg Sauer*

Institute of Catalysis Research and Technology (IKFT), Karlsruhe Institute of Technology (KIT),  
Hermann-von-Helmholtz Platz 1, 76344 Eggenstein-Leopoldshafen, Germany

## Supplementary Material

### A. Mathematical derivation of the reactor equations

A global mole balance in the reactor gives:

$$\frac{dn}{dt} = \dot{n}_{in} - \dot{n}_{out} + r \cdot m_{cat} \quad (S1)$$

Where  $\frac{dn}{dt}$  is the accumulation of material (mol·s<sup>-1</sup>),  $\dot{n}_{in}$  and  $\dot{n}_{out}$  are the mole flows entering and leaving the reactor respectively (mol·s<sup>-1</sup>),  $r$  is the total reaction rate (mol·kg<sub>cat</sub>·s<sup>-1</sup>) and  $m_{cat}$  is the total catalyst mass (kg) in the reactor.

There is no accumulation in steady-state operation:  $\frac{dn}{dt} = 0$ . With an infinitesimal control volume in the axial direction:

$$0 = \dot{n}_z - \dot{n}_{z+dz} + r \cdot dm_{cat} \quad (S2)$$

Here,  $dm_{cat}$  is the catalyst mass (kg) between position  $z$  and  $(z + dz)$ . Developing each term:

$$d\dot{n} = \dot{n}_{z+dz} - \dot{n}_z \quad (S3)$$

$$r = \sum_{j=1}^6 \sum_{k=1}^2 (v_{jk} \cdot r_k) \quad (S4)$$

$$dm_{cat} = \frac{m_{cat}}{L} \cdot dz \quad (S5)$$

Where  $L$  is the reactor length (m),  $v_{jk}$  is the stoichiometric coefficient of component  $j$  in reaction  $k$ ,  $r_k$  is the rate of reaction  $k$  (mol·kg<sub>cat</sub>·s<sup>-1</sup>). Substituting Eqs. (S3-S5) in (S2) and isolating  $\frac{d\dot{n}}{dz}$ , the first differential equation is derived:

$$\frac{d\dot{n}}{dz} = \frac{m_{cat}}{L} \cdot \sum_{j=1}^6 \sum_{k=1}^2 (v_{jk} \cdot r_k) \quad (S6)$$

From the total mole balance (S6), a mole balance from each component is derived:

$$\frac{d\dot{n}_j}{dz} = \frac{m_{cat}}{L} \cdot \sum_{k=1}^2 (v_{jk} \cdot r_k) \quad (S7)$$

The mole flow of component  $j$  ( $\dot{n}_j$ ) and its derivative is rewritten as:

$$\dot{n}_j = \dot{n} \cdot y_j \quad (S8)$$

$$\frac{d\dot{n}_j}{dz} = \dot{n} \cdot \frac{dy_j}{dz} + y_j \cdot \frac{d\dot{n}}{dz} \quad (S9)$$

Substituting Eq. (S9) in Eq. (S7) and isolating  $\frac{dy_j}{dz}$ , the second differential equation is derived:

$$\dot{n} \cdot \frac{dy_j}{dz} + y_j \cdot \frac{d\dot{n}}{dz} = \frac{m_{cat}}{L} \cdot \sum_{k=1}^2 (v_{jk} \cdot r_k) \quad (S10)$$

$$\frac{dy_j}{dz} = \frac{1}{\dot{n}} \cdot \left\{ \frac{m_{cat}}{L} \cdot \sum_{k=1}^2 (v_{jk} \cdot r_k) - y_j \cdot \frac{d\dot{n}}{dz} \right\} \quad (S11)$$

A global energy balance in the reactor is derived:

$$\frac{dU_{int}}{dt} = \dot{H}_{in} - \dot{H}_{out} + \dot{Q} \quad (S12)$$

Here,  $\frac{dU_{int}}{dt}$  is the internal energy accumulation (W),  $\dot{H}_{in}$  and  $\dot{H}_{out}$  are the enthalpy flow entering and leaving the reactor respectively (W), and  $\dot{Q}$  is the heat transfer between the reaction medium and the cooling fluid (W).  $\dot{Q}$  is calculated as follows:

$$\dot{Q} = U \cdot A_i \cdot (T_w - T) \quad (S13)$$

Where  $U$  is the global heat transfer coefficient ( $W \cdot m^{-2} \cdot K^{-1}$ ),  $A_i$  is the inner heat transfer area ( $m^2$ ),  $T_w$  is the temperature of the cooling fluid (K), and  $T$  is the reactor temperature (K).

There is no accumulation in steady-state operation:  $\frac{dU_{int}}{dt} = 0$ . With an infinitesimal control volume in the axial direction:

$$0 = \dot{H}_z - \dot{H}_{z+dz} + U \cdot (T_w - T) \cdot dA_i \quad (S14)$$

$$0 = -d\dot{H} + U \cdot (T_w - T) \cdot \pi \cdot D_i \cdot dz \quad (S15)$$

The derivative of the enthalpy flow ( $d\dot{H}$ ) is further developed:

$$d\dot{H} = d \left[ \dot{n} \cdot \sum_{j=1}^6 (y_j \cdot h_j) \right] \quad (S16)$$

$$d\dot{H} = \sum_{j=1}^6 (\dot{n} \cdot y_j \cdot dh_j + \dot{n} \cdot h_j \cdot dy_j + y_j \cdot h_j \cdot d\dot{n}) \quad (S17)$$

Where  $h_j$  is the specific enthalpy of component  $j$  ( $\text{J}\cdot\text{mol}^{-1}$ ). The derivative of the specific enthalpy is developed considering only temperature dependency:

$$dh_j = \frac{dh_j}{dT} \cdot dT = C_{P,j} \cdot dT \quad (\text{S18})$$

Here,  $C_{P,j}$  is the specific heat capacity of component  $j$  ( $\text{J}\cdot\text{mol}^{-1}\cdot\text{K}^{-1}$ ). The fluid specific enthalpy ( $h_f$ ) and the fluid heat capacity ( $C_{P,f}$ ) are defined as:

$$C_{P,f} = \sum_{j=1}^6 C_{P,j} \cdot y_j \quad (\text{S19})$$

$$h_f = \sum_{j=1}^6 y_j \cdot h_j \quad (\text{S20})$$

Substituting Eqs. (S17-S20) in Eq. (S15) and isolating  $\frac{dT}{dz}$ , the third differential equation is derived:

$$\frac{dT}{dz} = \frac{1}{(\dot{n} \cdot C_{P,f})} \cdot \left[ -\frac{d\dot{n}}{dz} \cdot h_f - \dot{n} \cdot \sum_{j=1}^6 \left( h_j \cdot \frac{dy_j}{dz} \right) + U \cdot \pi \cdot D_i \cdot (T_w - T) \right] \quad (\text{S21})$$

The specific heat capacity and the specific enthalpy were calculated by polynomial correlations. The parameters estimated by Goos et al. [1] are provided in Table S1.

$$C_{P,j}(T, 1 \text{ bar}) = R \cdot (a_{1,j} + a_{2,j} \cdot T + a_{3,j} \cdot T^2 + a_{4,j} \cdot T^3 + a_{5,j} \cdot T^4) \quad (\text{S22})$$

$$h_j(T, 1 \text{ bar}) = R \cdot \left( a_{1,j} \cdot T + \frac{a_{2,j}}{2} \cdot T^2 + \frac{a_{3,j}}{3} \cdot T^3 + \frac{a_{4,j}}{4} \cdot T^4 + \frac{a_{5,j}}{5} \cdot T^5 + a_{6,j} \right) \quad (\text{S23})$$

**Table S1.** Parameters for the estimation of the specific heat capacity and specific enthalpy of selected components in the gas phase [1]. Reproduced with permission from [1].

| Gas                | $a_1$     | $a_2 \cdot 10^3$ | $a_3 \cdot 10^5$ | $a_4 \cdot 10^8$ | $a_5 \cdot 10^{11}$ | $a_6 \cdot 10^{-4}$ |
|--------------------|-----------|------------------|------------------|------------------|---------------------|---------------------|
| H <sub>2</sub>     | 2.3443311 | 7.9805208        | -1.9478151       | 2.0157209        | -0.7376118          | -0.0917935          |
| CO                 | 3.5795335 | -0.6103537       | 0.1016814        | 0.0907006        | -0.0904424          | -1.4344086          |
| CO <sub>2</sub>    | 2.3568130 | 8.9841299        | -0.7122063       | 0.2457301        | -0.0142885          | -4.8371971          |
| CH <sub>3</sub> OH | 5.6585105 | -16.2983419      | 6.9193816        | -7.5837293       | 2.8042755           | -2.5611974          |
| H <sub>2</sub> O   | 4.1986352 | -2.0364017       | 0.6520342        | -0.5487927       | 0.1771968           | -3.0293726          |
| N <sub>2</sub>     | 3.5310053 | -0.1236610       | -0.0502999       | 0.2435306        | -0.1408812          | -0.1046976          |

## B. Calculation of the heat transfer coefficient in the reactor

In the methanol synthesis reactor, the global heat transfer coefficient between syngas and the cooling fluid ( $U$ ) is calculated as a combination of four heat transfer resistances ( $R_{1-4}$ ):

1. The heat transfer in the bulk of the two-phase system (catalyst and gas);
2. The heat transfer between the two-phase system and the tube inner wall;
3. The heat transfer through the reactor wall;
4. The heat transfer between the tube outer wall and the cooling fluid (boiling water).

This results from the use of a heat transfer coefficient model described in the VDI Heat Atlas ( $\alpha_w$  – Model) [2], where the radial thermal conductivity of the two-phase system is constant over the radius of the reactor tube. According to Gruber,[3] the global heat transfer coefficient ( $U$ ) can be calculated as follows:

$$U \cdot A_i = R_1 + R_2 + R_3 + R_4 \quad (S24)$$

$$U \cdot A_i = \left( \frac{D_i}{8 \cdot \Lambda_r \cdot A_i} + \frac{1}{\alpha_{w,i} \cdot A_i} + \frac{s_t}{\lambda_t \cdot A_m} + \frac{1}{\alpha_{w,o} \cdot A_o} \right)^{-1} \quad (S25)$$

Where  $\Lambda_r$  is the effective radial thermal conductivity of the two-phase system,  $A_i$  is the inner surface area of the reactor tube,  $\alpha_{w,i}$  is the heat transfer coefficient between the reactive system and the inner wall,  $s_t$  is the thickness of the reactor tube,  $\lambda_t$  is the thermal conductivity of the reactor tube,  $A_m$  is the averaged surface area of the reactor tube,  $\alpha_{w,o}$  is the heat transfer coefficient between the outer wall and the cooling fluid, and  $A_o$  is the outer surface area of the reactor tube.

The effective radial thermal conductivity  $\Lambda_r$  is calculated as follows:

$$\frac{\Lambda_r}{\lambda_f} = \frac{\lambda_{bed}}{\lambda_f} + \frac{Pe_0}{K_r} \quad (S26)$$

Here,  $\lambda_f$  is the thermal conductivity of the fluid,  $Pe_0$  is the Peclet number calculated with the superficial velocity, and  $K_r$  is the inverse of the inclination parameter.

The thermal conductivity of the two-phase system  $\lambda_{bed}$  is calculated from the ZBS-Model [2]. In this work, only the primary parameters ( $\lambda_f$ ), the thermal conductivity of the catalyst particles ( $\lambda_p$ ) and the porosity of the bed ( $\psi = 0.39$ ) were included.  $\lambda_{bed}$  can then be calculated as

$$\frac{\lambda_{bed}}{\lambda_f} = 1 - \sqrt{1 - \psi} + \sqrt{1 - \psi} \cdot k_c \quad (S27)$$

Where  $k_c$  is the thermal conductivity of the core of the unit cell. The estimation of  $\alpha_{w,i}$  is made through the Nusselt number ( $Nu_w$ ):

$$Nu_w = \frac{\alpha_{w,i} \cdot d_p}{\lambda_f} \quad (S28)$$

Here,  $d_p$  is the particle diameter ( $d_p = 2$  mm). A correlation for  $Nu_w$  is used:[2]

$$Nu_w = \left( 1.3 + 5 \cdot \frac{d_p}{D_i} \right) \cdot \frac{\lambda_{bed}}{\lambda_f} + 0.19 \cdot Re_0^{0.75} \cdot Pr^{1/3} \quad (S29)$$

Where  $d$  is the particle diameter,  $Re_0$  is the Reynolds number, and  $Pr$  is the Prandtl number. This function is valid for a Peclet number ( $Pe_0$ ) between 1 and  $10^4$ , and for  $D_i / d_p$  between 1.2 and 51.

Finally, a constant value of  $\alpha_{w,o}$  = of  $1000 \text{ W} \cdot \text{m}^{-2} \cdot \text{K}^{-1}$  was considered for the heat transfer between the tube outer wall and boiling water [3].

### C. Flash drums and distillation column – Assumptions for the Matlab simulations

**Table S2.** Liquid and gas fractions (% mol/mol) of the phase separation via flash drums and the separation via the distillation column in the one-step process. Values taken from Aspen Plus calculations and used for the Matlab simulations.

| Equipment           | Phase        | H <sub>2</sub> | CO    | CO <sub>2</sub> | CH <sub>3</sub> OH | H <sub>2</sub> O | N <sub>2</sub> |
|---------------------|--------------|----------------|-------|-----------------|--------------------|------------------|----------------|
| Flash drums 1-2     | Gas          | 100.00         | 99.92 | 99.12           | 28.32              | 6.41             | 99.93          |
|                     | Liquid       | 0              | 0.08  | 0.88            | 71.68              | 93.59            | 0.07           |
| Flash drum 3        | Gas          | 99.87          | 97.93 | 77.16           | 1.09               | 0.21             | 98.08          |
|                     | Liquid       | 0.13           | 2.07  | 22.84           | 98.91              | 99.79            | 1.92           |
| Flash drum 4        | Gas          | 99.97          | 99.58 | 94.69           | 6.42               | 1.37             | 99.61          |
|                     | Liquid       | 0.03           | 0.42  | 5.32            | 93.59              | 98.63            | 0.39           |
| Distillation Column | Gas Dist.    | 99.89          | 98.62 | 87.93           | 3.80               | 0.01             | 98.70          |
|                     | Liquid Dist. | 0.11           | 1.38  | 12.07           | 96.13              | 0.57             | 1.30           |
|                     | Bottoms      | 0.00           | 0.00  | 0.00            | 0.06               | 99.42            | 0.00           |

**Table S3.** Liquid and gas fractions (% mol/mol) of the phase separation via flash drums and the separation via the distillation column in the three-step process. Values taken from Aspen Plus calculations and used for the Matlab simulations.

| Equipment       | Phase  | H <sub>2</sub> | CO    | CO <sub>2</sub> | CH <sub>3</sub> OH | H <sub>2</sub> O | N <sub>2</sub> |
|-----------------|--------|----------------|-------|-----------------|--------------------|------------------|----------------|
| Flash drums 1-2 | Gas    | 100.00         | 99.94 | 99.32           | 34.02              | 8.29             | 99.94          |
|                 | Liquid | 0              | 0.06  | 0.68            | 65.98              | 91.71            | 0.06           |

|                     |              |       |       |       |       |       |       |
|---------------------|--------------|-------|-------|-------|-------|-------|-------|
| Flash drum 3        | Gas          | 99.91 | 98.86 | 88.92 | 4.39  | 0.98  | 98.93 |
|                     | Liquid       | 0.09  | 1.14  | 11.08 | 95.61 | 99.02 | 1.07  |
| Flash drum 4        | Gas          | 99.92 | 98.77 | 86.22 | 2.37  | 0.50  | 98.86 |
|                     | Liquid       | 0.08  | 1.23  | 13.78 | 97.63 | 99.50 | 1.14  |
| Flash drum 5        | Gas          | 99.69 | 95.56 | 61.86 | 0.60  | 0.12  | 95.85 |
|                     | Liquid       | 0.31  | 4.44  | 38.14 | 99.40 | 99.88 | 4.15  |
| Flash drum 6        | Gas          | 99.95 | 99.29 | 91.34 | 3.90  | 0.82  | 99.34 |
|                     | Liquid       | 0.05  | 0.71  | 8.66  | 96.10 | 99.18 | 0.66  |
| Distillation Column | Gas Dist.    | 99.88 | 98.46 | 86.67 | 3.41  | 0.01  | 98.55 |
|                     | Liquid Dist. | 0.12  | 1.54  | 13.33 | 96.58 | 0.68  | 1.45  |
|                     | Bottoms      | 0.00  | 0.00  | 0.00  | 0.01  | 99.31 | 0.00  |

#### D. Kinetic model implementation in Aspen Plus

In order to implement a kinetic model in Aspen Plus, parameters must be rearranged to fulfill specific format requirements. The kinetic model type of Langmuir-Hinshelwood-Hougen-Watson (LHHW) was chosen, with a reacting phase containing only vapor, a rate basis in catalyst weight, and the concentration basis ( $C_i$ ) in fugacity (Pa). As the fugacities of Model-6p[4] are with the unit ‘bar’, the reference pressure ( $p_0 = 1$  bar) were omitted. However, since Aspen Plus require fugacity in ‘Pa’, the reference pressure ( $p_0 = 10^5$  Pa) must appear, and therefore is seen in corresponding expressions between Aspen and Model-6p.

The reaction rates of the LHHW kinetic model type ( $\text{kmol} \cdot \text{kg}^{-1} \cdot \text{s}^{-1}$ ) follow this expression:

$$r = \frac{[\text{kinetic factor}] \cdot [\text{Driving force expression}]}{[\text{Adsorption expression}]} \quad (\text{S30})$$

The kinetic factor is described as:

$$[\text{kinetic factor}] = k \cdot T^n \cdot \exp\left(\frac{-E_A}{R \cdot T}\right) \quad (\text{S31})$$

The corresponding expressions from Model-6p in relation to parameters  $k$ ,  $n$ ,  $E_A$  are detailed in Table S4.

The driving force expression has two terms, how are described as:

$$[\text{Term 1}] = \exp\left[A + \frac{B}{T} + C \cdot \ln(T) + D \cdot T\right] \cdot \prod_{j=1}^{N_g} (f_j^{v_j}) \quad (\text{S32})$$

$$[\text{Term 2}] = \exp\left[A + \frac{B}{T} + C \cdot \ln(T) + D \cdot T\right] \cdot \prod_{j=1}^{N_g} (f_j^{v_j}) \quad (\text{S33})$$

$$[Driving\ force\ expression] = [Term\ 1] - [Term\ 2] \quad (S34)$$

**Table S4.** Aspen kinetic factor and Model-6p corresponding expressions.

| Parameter<br>in Aspen | Corresponding expression<br>from Model-6p [4]               | Value                |                     | Unit                            |
|-----------------------|-------------------------------------------------------------|----------------------|---------------------|---------------------------------|
|                       |                                                             | CO <sub>2</sub> hyd. | rWGSR               |                                 |
| <b>k</b>              | $\phi_{zn} \cdot \exp(A_i) \cdot \frac{1\ kmol}{1000\ mol}$ | 181.211              | $4.4771 \cdot 10^8$ | $\frac{kmol}{kg_{cat} \cdot s}$ |
| <b>n</b>              | 0                                                           | 0                    | 0                   | —                               |
| <b>E</b>              | $E_{A,i}$                                                   | 94.73                | 132.79              | $\frac{kJ}{mol}$                |

In Table S5, the corresponding expressions from Model-6p in relation to the coefficients of the driving force constant ( $A$ ,  $B$ ,  $C$ ,  $D$ ) are detailed, while the concentration exponents  $v_j$  are described in Table S6.

**Table S5.** Coefficients of the driving force constant and the corresponding expressions from Model-6p.

| Term | Reaction                   | Parameter<br>in Aspen | Corresponding expression in<br>Model-6p   | Value     |
|------|----------------------------|-----------------------|-------------------------------------------|-----------|
| 1    | CO <sub>2</sub><br>hydrog. | A                     | $\ln(p_0^{-2.5})$                         | - 28.7823 |
|      |                            | B                     | 0                                         | 0         |
|      |                            | C                     | 0                                         | 0         |
|      |                            | D                     | 0                                         | 0         |
|      | rWGSR                      | A                     | $\ln(p_0^{-2})$                           | - 23.0259 |
|      |                            | A                     | 0                                         | 0         |
|      |                            | B                     | 0                                         | 0         |
|      |                            | C                     | 0                                         | 0         |
| 2    | CO <sub>2</sub><br>hydrog. | A                     | $\ln(p_0^{-0.5}) - A_{eq.const.CO_2hyd.}$ | - 14.1255 |
|      |                            | B                     | $-B_{eq.const.CO_2hyd.}$                  | - 4755.7  |
|      |                            | C                     | $-C_{eq.const.CO_2hyd.}$                  | 4.481     |
|      |                            | D                     | 0                                         | 0         |
|      | rWGSR                      | A                     | $\ln(p_0^{-2}) - A_{eq.const.rWGSR}$      | - 35.5949 |
|      |                            | B                     | $-B_{eq.const.rWGSR}$                     | 5337.4    |
|      |                            | C                     | $-C_{eq.const.rWGSR}$                     | 1.097     |

|  |   |   |   |
|--|---|---|---|
|  | D | 0 | 0 |
|--|---|---|---|

**Table S6.** Concentration exponents ( $v_j$ ) of the driving force expression.

| Gas component      | Methanol synthesis |        | rWGSR  |        |
|--------------------|--------------------|--------|--------|--------|
|                    | Term 1             | Term 2 | Term 1 | Term 2 |
| H <sub>2</sub>     | 1.5                | - 1.5  | 0      | - 1    |
| CO                 | –                  | –      | 0      | 1      |
| CO <sub>2</sub>    | 1                  | 0      | 1      | 0      |
| CH <sub>3</sub> OH | 0                  | - 1    | –      | –      |
| H <sub>2</sub> O   | 0                  | - 1    | 1      | 2      |

The adsorption expression is:

$$[Adsorption\ exp.] = \sum_{k=1}^{N_t} \left\{ \exp \left[ A_k + \frac{B_k}{T} + C_k \cdot \ln(T) + D_k \cdot T \right] \cdot \prod_{j=1}^{N_g} (f_j^{v_{j,k}}) \right\}^n \quad (S35)$$

Where  $N_t$  is the number of terms. By looking at the expressions from Model-6p:

$$[Adsorption\ exp.\ Model - 6p] = (\theta_b \cdot \theta_c)^{-1} \quad (S36)$$

$$[Adsorption\ exp.\ Model - 6p] = \left( \overline{K}_2 \cdot \frac{f_{H_2}^{0.5} \cdot f_{CO_2}}{p_0^{1.5}} + 1 \right) \cdot \left( \overline{K}_3 \cdot \frac{f_{H_2}^{-0.5} \cdot f_{H_2O}}{p_0^{0.5}} + 1 \right) \quad (S37)$$

$$[Adsorption\ exp.\ Model - 6p] = 1 + \overline{K}_2 \cdot \frac{f_{H_2}^{0.5} \cdot f_{CO_2}}{p_0^{1.5}} + \overline{K}_3 \cdot \frac{f_{H_2}^{-0.5} \cdot f_{H_2O}}{p_0^{0.5}} + \overline{K}_2 \cdot \overline{K}_3 \cdot \frac{f_{CO_2} \cdot f_{H_2O}}{p_0^2} \quad (S38)$$

From Eq. (9), the adsorption expression exponent is  $n = 1$ . The correspondence with Model-6p is described in Table S7 (adsorption constants) and in Table S8 (concentration exponents).

**Table S7.** Adsorption constants and the corresponding expression of Model-6p.

| Adsorption constants | Corresponding expression in Model-6p                      | Value    |
|----------------------|-----------------------------------------------------------|----------|
| A – Term 1           | $\ln(1)$                                                  | 0        |
| A – Term 2           | $\ln(\overline{K}_2 \cdot p_0^{-1.5})$                    | -18.237  |
| A – Term 3           | $\ln(\overline{K}_3 \cdot p_0^{-0.5})$                    | -3.64262 |
| A – Term 4           | $\ln(\overline{K}_2 \cdot \overline{K}_3 \cdot p_0^{-2})$ | -21.8796 |



**Table S8.** Concentration exponents and the corresponding values of Model-6p.

| Gas components   | Term 1 | Term 2 | Term 3 | Term 4 |
|------------------|--------|--------|--------|--------|
| CO <sub>2</sub>  | 0      | 1      | 0      | 1      |
| H <sub>2</sub>   | 0      | 0.5    | -0.5   | 0      |
| H <sub>2</sub> O | 0      | 0      | 1      | 1      |

### E. One-step process – Simulation in Aspen Plus and stream properties

In Figure S1, the Aspen flowsheet of the one-step process is presented. Feed CO<sub>2</sub> (1-CO<sub>2</sub>, 4824 kmol·h<sup>-1</sup>) is mixed with a recycle stream (39-REC, 2786 kmol·h<sup>-1</sup>) (MIXER1), which mainly consists of CO<sub>2</sub>, but also contains methanol, water, nitrogen, hydrogen and traces of CO. The mixed gas is compressed from 1 to 70 bar in three stages with equal pressure ratio (CP1-CO<sub>2</sub>, CP2-CO<sub>2</sub>, CP3-CO<sub>2</sub>). Intermediate cooling is performed with cooling water (HE1) and with a pressurized recycle stream (35) (HE2). Condensed methanol and water are separated in intermediate flash units (FLASH1 at 30 °C and FLASH2 at 45 °C), preventing liquid to enter the compressors. Finally, compressed CO<sub>2</sub> (9) is used to partially heat pressurized water (51W) (HE3), the latter serving as cooling fluid in the reactor modules later on.

Hydrogen (11-H<sub>2</sub>, 14472 kmol·h<sup>-1</sup>) is compressed in a single stage from 30 to 70 bar (CP-H<sub>2</sub>). CO<sub>2</sub> (10) and H<sub>2</sub> (12) are combined with a pressurized recycle stream (36-REC, 51504 kmol·h<sup>-1</sup>) (MIXER2), which is mainly composed of H<sub>2</sub> (73% mol/mol), CO<sub>2</sub> (18% mol/mol), and N<sub>2</sub> (7% mol/mol), but also contains low concentrations of CO, methanol and water.

The mixed gas (13) is pre-heated (HE4) with the product stream to 237.5 °C. The reactor feed stream (14) is split into the six reactor modules, which work in parallel and have boiling water at 247.5 °C as cooling fluid (54W and 56W). Here, the number of tubes of both RPLUG units (REACTOR1 and REACTOR2) was set to 99000 tubes, so that the parallel operation of six reactor modules with 33000 tubes each are simulated (tube quantity is limited to 99999 in Aspen). Reactor setpoint temperature (247.5 °C) is rapidly achieved ( $z = 0.09$  m), after which isothermal conditions are maintained ( $\Delta T_{max} < 3$  °C).

The reactor product streams (16 and 18) are combined (MIXER3) and cooled down to 30 °C in four stages: first by the reactor feed (13) (HE4), second by the column feed (28) (HE5), third by the feed of flash drum 4 (26) (HE6), and finally by cooling water (HE7). The first phase

separation occurs in a flash drum (FLASH3 at 30 °C and 69.25 bar), with the gas phase (33) rich in H<sub>2</sub>, CO<sub>2</sub> and N<sub>2</sub>, and the liquid phase (24) rich in methanol and water, but still containing a considerable amount of CO<sub>2</sub>.

The gas stream (33) has a 2% purge (44-PURGE, 1051 kmol·h<sup>-1</sup>). The remaining recycle stream (34) is recompressed to 70 bar (CP-REC), partially heated (HE2), and mixed with the reactor feed (MIXER1).

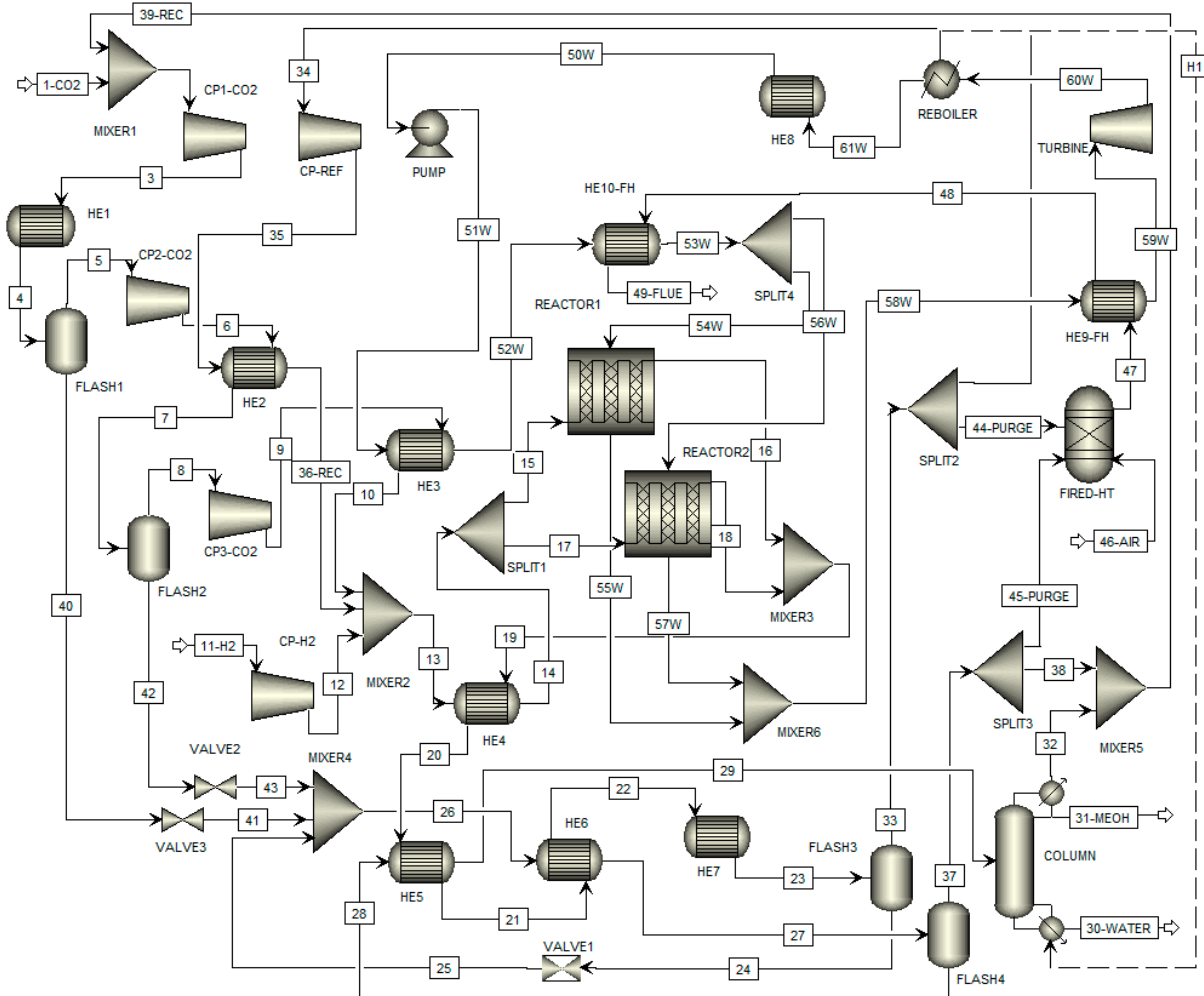

**Figure S1.** One-step process – Aspen Plus flowsheet.

The liquid stream (24) enters a choke valve (VALVE1), where its pressure is reduced to 1 bar, and afterwards is mixed (MIXER4) with the liquid fractions of FLASH1 and FLASH2 from the three-stage compression process. The mixed stream (26) is slightly heated to 30 °C (HE5), and enters another flash drum (FLASH4 at 30 °C and 1 bar), where more CO<sub>2</sub> is recovered in the gas phase (37). 2% of the gas stream (37) is purged from the system (45-PURGE, 51 kmol·h<sup>-1</sup>), and the remaining stream (38) is mixed with the gas distillate (32) (MIXER5) and with feed CO<sub>2</sub> (1-CO<sub>2</sub>) (MIXER1).

The liquid phase (28) from FLASH4, which mainly consists of methanol and water, is pre-heated (HE5) and then enters a distillation column with a partial vapor-liquid condenser at 53 °C and a kettle reboiler at 99.6 °C. The column has 30 stages, a reflux ratio of 2, and the feed enters above the 24<sup>th</sup> stage. Water as bottom stream (30-WATER, 4581 kmol·h<sup>-1</sup>) and methanol as liquid distillate (31-MEOH, 4542 kmol·h<sup>-1</sup>) are obtained in a purity of 99.99% and 99.67% mol/mol, respectively, while the gas distillate (32) consists of a mixture between methanol (62.97% mol/mol) and CO<sub>2</sub> (36.91% mol/mol).

The purge streams (44-PURGE and 45-PURGE) are fed into a fired heater and burned with air (46-AIR, 2232 kmol·h<sup>-1</sup>). Air excess is set to 15%, following the recommendation from the American Petroleum Institute [5]. The fired heater is composed of the burner (FIRED-HT) and two heat exchangers (HE9-FH and HE10-FH).

In order to make use of the energy generated in the methanol synthesis, the reactor cooling fluid (water) flows in a Rankine cycle. The cycle starts with liquid water at 1 bar and 99.6 °C (50W, 8120 kmol·h<sup>-1</sup>) being pumped to 38.07 bar, which is then heated until its boiling temperature (247.5 °C) in two steps: first by compressed CO<sub>2</sub> (9) (HE3), and then by the flue gas (48) in the fired heater (HE10-FH). The boiling water stream (53W) is split into the reactor modules and evaporates with the heat released by the methanol synthesis. The resulting streams of saturated vapor (55W and 57W) are merged (MIXER6), and then further heated in the fired heater (HE9-FH) up to 542 °C. The resulting superheated steam (59W) is expanded until 1.43 bar in a turbine coupled with an electric generator, and 30.3 MW of electricity is gained. Low pressure steam (59W) at 155 °C and a boiling temperature of 110 °C exits the turbine and is the heat source of the column reboiler. The hot side is simulated in Aspen Plus with a heater block named REBOILER, and a heat stream is sent to the column (dashed line, H1). After being partially condensed in the reboiler, the remaining steam (61W) (vapor fraction: 0.47) is completely condensed with cooling water (HE13), completing the water cycle.

**Table S9.** Properties of the streams from the one-step process.

| Stream ID       | Mole flow<br>[kmol·h <sup>-1</sup> ] | Mass flow<br>[t·h <sup>-1</sup> ] | Temp.<br>[°C] | Pressure<br>[bar] | Mole enthalpy<br>[MJ·kmol <sup>-1</sup> ] | Mole entropy<br>[kJ· kmol <sup>-1</sup> ·K <sup>-1</sup> ] | Total<br>Exergy<br>[MJ·kmol <sup>-1</sup> ] |
|-----------------|--------------------------------------|-----------------------------------|---------------|-------------------|-------------------------------------------|------------------------------------------------------------|---------------------------------------------|
| <b>1-CO2</b>    | 4824                                 | 211.7                             | 25.0          | 1.00              | -392.75                                   | 3.02                                                       | 0.0                                         |
| <b>2</b>        | 7610                                 | 323.9                             | 27.8          | 1.00              | -373.65                                   | -2.17                                                      | 102.4                                       |
| <b>3</b>        | 7610                                 | 323.9                             | 155.3         | 4.12              | -368.48                                   | 0.32                                                       | 111.8                                       |
| <b>4</b>        | 7610                                 | 323.9                             | 30.0          | 4.12              | -374.91                                   | -17.99                                                     | 109.7                                       |
| <b>5</b>        | 7333                                 | 315.8                             | 30.0          | 4.12              | -379.32                                   | -10.92                                                     | 69.5                                        |
| <b>6</b>        | 7333                                 | 315.8                             | 158.6         | 16.98             | -374.11                                   | -8.44                                                      | 78.6                                        |
| <b>7</b>        | 7333                                 | 315.8                             | 45.0          | 16.98             | -379.57                                   | -23.37                                                     | 76.6                                        |
| <b>8</b>        | 7138                                 | 309.3                             | 45.0          | 16.98             | -382.65                                   | -18.86                                                     | 47.1                                        |
| <b>9</b>        | 7138                                 | 309.3                             | 178.0         | 70.00             | -377.20                                   | -16.38                                                     | 56.4                                        |
| <b>10</b>       | 7138                                 | 309.3                             | 111.0         | 70.00             | -380.03                                   | -23.16                                                     | 54.8                                        |
| <b>11-H2</b>    | 14472                                | 31.1                              | 25.0          | 30.00             | 0.00                                      | -27.91                                                     | 1176.9                                      |
| <b>12</b>       | 14472                                | 31.1                              | 127.4         | 70.00             | 2.97                                      | -26.38                                                     | 1187.1                                      |
| <b>13</b>       | 73113                                | 948.6                             | 81.4          | 70.00             | -86.80                                    | -22.14                                                     | 4488.1                                      |
| <b>14</b>       | 73113                                | 948.6                             | 237.5         | 70.00             | -81.60                                    | -10.00                                                     | 4520.1                                      |
| <b>15</b>       | 36557                                | 474.3                             | 237.5         | 70.00             | -81.60                                    | -10.00                                                     | 2260.0                                      |
| <b>16</b>       | 32021                                | 474.3                             | 247.9         | 69.25             | -97.10                                    | -17.44                                                     | 2163.2                                      |
| <b>17</b>       | 36557                                | 474.3                             | 237.5         | 70.00             | -81.60                                    | -10.00                                                     | 2260.0                                      |
| <b>18</b>       | 32021                                | 474.3                             | 247.9         | 69.25             | -97.10                                    | -17.44                                                     | 2163.2                                      |
| <b>19</b>       | 64042                                | 948.5                             | 247.9         | 69.25             | -97.10                                    | -17.44                                                     | 4326.4                                      |
| <b>20</b>       | 64042                                | 948.5                             | 133.2         | 69.25             | -103.03                                   | -30.71                                                     | 4291.2                                      |
| <b>21</b>       | 64042                                | 948.5                             | 62.0          | 69.25             | -108.84                                   | -46.20                                                     | 4270.1                                      |
| <b>22</b>       | 64042                                | 948.5                             | 56.9          | 69.25             | -109.12                                   | -47.04                                                     | 4269.6                                      |
| <b>23</b>       | 64042                                | 948.5                             | 30.0          | 69.25             | -110.23                                   | -50.19                                                     | 4261.2                                      |
| <b>24</b>       | 11488                                | 328.0                             | 30.0          | 69.25             | -284.19                                   | -162.33                                                    | 950.1                                       |
| <b>25</b>       | 11488                                | 328.0                             | 18.5          | 1.00              | -284.19                                   | -159.00                                                    | 946.9                                       |
| <b>26</b>       | 11960                                | 342.6                             | 18.9          | 1.00              | -283.31                                   | -160.44                                                    | 1016.2                                      |
| <b>27</b>       | 11960                                | 342.6                             | 30.0          | 1.00              | -281.80                                   | -155.45                                                    | 1016.3                                      |
| <b>28</b>       | 9412                                 | 238.8                             | 30.0          | 1.00              | -263.70                                   | -195.62                                                    | 949.2                                       |
| <b>29</b>       | 9412                                 | 238.8                             | 82.9          | 1.00              | -224.18                                   | -81.88                                                     | 963.8                                       |
| <b>30-WATER</b> | 4581                                 | 82.5                              | 99.6          | 1.00              | -280.00                                   | -145.98                                                    | 1.0                                         |
| <b>31-MEOH</b>  | 4542                                 | 145.7                             | 53.0          | 1.00              | -236.17                                   | -231.08                                                    | 912.6                                       |
| <b>32</b>       | 289                                  | 10.5                              | 53.0          | 1.00              | -270.63                                   | -71.02                                                     | 36.8                                        |
| <b>33</b>       | 52555                                | 620.6                             | 30.0          | 69.25             | -72.20                                    | -25.68                                                     | 3311.1                                      |
| <b>34</b>       | 51504                                | 608.2                             | 30.0          | 69.25             | -72.20                                    | -25.68                                                     | 3244.9                                      |
| <b>35</b>       | 51504                                | 608.2                             | 31.2          | 70.00             | -72.16                                    | -25.65                                                     | 3245.3                                      |
| <b>36-REC</b>   | 51504                                | 608.2                             | 56.7          | 70.00             | -71.39                                    | -23.19                                                     | 3245.9                                      |
| <b>37</b>       | 2548                                 | 103.8                             | 30.0          | 1.00              | -348.67                                   | -7.11                                                      | 67.2                                        |
| <b>38</b>       | 2497                                 | 101.7                             | 30.0          | 1.00              | -348.67                                   | -7.11                                                      | 65.8                                        |
| <b>39-REC</b>   | 2786                                 | 112.3                             | 33.0          | 1.00              | -340.58                                   | -13.18                                                     | 102.5                                       |
| <b>40</b>       | 276                                  | 8.2                               | 30.0          | 4.12              | -258.07                                   | -205.74                                                    | 40.1                                        |
| <b>41</b>       | 276                                  | 8.2                               | 25.8          | 1.00              | -258.07                                   | -205.32                                                    | 40.0                                        |
| <b>42</b>       | 196                                  | 6.4                               | 45.0          | 16.98             | -267.32                                   | -187.87                                                    | 29.3                                        |
| <b>43</b>       | 196                                  | 6.4                               | 29.1          | 1.00              | -267.32                                   | -184.53                                                    | 29.3                                        |
| <b>44-PURGE</b> | 1051                                 | 12.4                              | 30.0          | 69.25             | -72.20                                    | -25.68                                                     | 66.2                                        |
| <b>45-PURGE</b> | 51                                   | 2.1                               | 30.0          | 1.00              | -348.67                                   | -7.11                                                      | 1.3                                         |

|               |      |      |        |      |        |       |      |
|---------------|------|------|--------|------|--------|-------|------|
| <b>46-AIR</b> | 2232 | 64.4 | 25.0   | 1.00 | 0.00   | 4.38  | 0.0  |
| <b>47</b>     | 2944 | 78.9 | 1798.0 | 1.00 | -31.81 | 65.74 | 38.9 |
| <b>48</b>     | 2944 | 78.9 | 1095.9 | 1.00 | -60.67 | 48.77 | 19.5 |

**Table S9.** *(continuation)*

| <b>Stream ID</b> | <b>Mole flow<br/>[kmol·h<sup>-1</sup>]</b> | <b>Mass flow<br/>[t·h<sup>-1</sup>]</b> | <b>Temp.<br/>[°C]</b> | <b>Pressure<br/>[bar]</b> | <b>Mole enthalpy<br/>[MJ·kmol<sup>-1</sup>]</b> | <b>Mole entropy<br/>[kJ· kmol<sup>-1</sup>·K<sup>-1</sup>]</b> | <b>Total<br/>Exergy<br/>[MJ·kmol<sup>-1</sup>]</b> |
|------------------|--------------------------------------------|-----------------------------------------|-----------------------|---------------------------|-------------------------------------------------|----------------------------------------------------------------|----------------------------------------------------|
| <b>49-FLUE</b>   | 2944                                       | 78.9                                    | 162.5                 | 1.00                      | -94.18                                          | 8.51                                                           | 1.9                                                |
| <b>50W</b>       | 8120                                       | 146.3                                   | 99.6                  | 1.00                      | -280.01                                         | -145.97                                                        | 1.5                                                |
| <b>51W</b>       | 8120                                       | 146.3                                   | 100.9                 | 38.07                     | -279.90                                         | -145.70                                                        | 1.6                                                |
| <b>52W</b>       | 8120                                       | 146.3                                   | 130.3                 | 38.07                     | -277.42                                         | -139.47                                                        | 3.0                                                |
| <b>53W</b>       | 8120                                       | 146.3                                   | 247.5                 | 38.07                     | -265.27                                         | -115.18                                                        | 14.1                                               |
| <b>54W</b>       | 4060                                       | 73.1                                    | 247.5                 | 38.07                     | -265.27                                         | -115.18                                                        | 7.0                                                |
| <b>55W</b>       | 4060                                       | 73.1                                    | 247.5                 | 38.07                     | -234.21                                         | -55.53                                                         | 22.0                                               |
| <b>56W</b>       | 4060                                       | 73.1                                    | 247.5                 | 38.07                     | -265.27                                         | -115.18                                                        | 7.0                                                |
| <b>57W</b>       | 4060                                       | 73.1                                    | 247.5                 | 38.07                     | -234.21                                         | -55.53                                                         | 22.0                                               |
| <b>58W</b>       | 8120                                       | 146.3                                   | 247.5                 | 38.07                     | -234.21                                         | -55.53                                                         | 44.0                                               |
| <b>59W</b>       | 8120                                       | 146.3                                   | 528.8                 | 38.07                     | -223.74                                         | -39.50                                                         | 56.8                                               |
| <b>60W</b>       | 8120                                       | 146.3                                   | 147.5                 | 1.43                      | -237.66                                         | -35.61                                                         | 22.8                                               |
| <b>61W</b>       | 8120                                       | 146.3                                   | 110.0                 | 1.43                      | -261.46                                         | -97.58                                                         | 10.8                                               |

**Table S10.** Molar composition (% mol/mol) of the streams from the one-step process.

| Stream ID       | H <sub>2</sub> | CO    | CO <sub>2</sub> | CH <sub>3</sub> OH | H <sub>2</sub> O | N <sub>2</sub> | O <sub>2</sub> |
|-----------------|----------------|-------|-----------------|--------------------|------------------|----------------|----------------|
| <b>1-CO2</b>    | 0.000          | 0.000 | 99.500          | 0.000              | 0.500            | 0.000          | 0.000          |
| <b>2</b>        | 0.567          | 0.247 | 90.986          | 6.362              | 1.100            | 0.737          | 0.000          |
| <b>3</b>        | 0.567          | 0.247 | 90.986          | 6.362              | 1.100            | 0.737          | 0.000          |
| <b>4</b>        | 0.567          | 0.247 | 90.986          | 6.362              | 1.100            | 0.737          | 0.000          |
| <b>5</b>        | 0.589          | 0.257 | 94.196          | 3.892              | 0.302            | 0.764          | 0.000          |
| <b>6</b>        | 0.589          | 0.257 | 94.196          | 3.892              | 0.302            | 0.764          | 0.000          |
| <b>7</b>        | 0.589          | 0.257 | 94.196          | 3.892              | 0.302            | 0.764          | 0.000          |
| <b>8</b>        | 0.605          | 0.264 | 96.313          | 1.964              | 0.069            | 0.785          | 0.000          |
| <b>9</b>        | 0.605          | 0.264 | 96.313          | 1.964              | 0.069            | 0.785          | 0.000          |
| <b>10</b>       | 0.605          | 0.264 | 96.313          | 1.964              | 0.069            | 0.785          | 0.000          |
| <b>11-H2</b>    | 99.500         | 0.000 | 0.000           | 0.000              | 0.000            | 0.500          | 0.000          |
| <b>12</b>       | 99.500         | 0.000 | 0.000           | 0.000              | 0.000            | 0.500          | 0.000          |
| <b>13</b>       | 71.346         | 1.515 | 21.874          | 0.292              | 0.026            | 4.946          | 0.000          |
| <b>14</b>       | 71.346         | 1.515 | 21.874          | 0.292              | 0.026            | 4.946          | 0.000          |
| <b>15</b>       | 71.346         | 1.515 | 21.874          | 0.292              | 0.026            | 4.946          | 0.000          |
| <b>16</b>       | 60.170         | 1.765 | 17.855          | 7.415              | 7.147            | 5.647          | 0.000          |
| <b>17</b>       | 71.346         | 1.515 | 21.874          | 0.292              | 0.026            | 4.946          | 0.000          |
| <b>18</b>       | 60.170         | 1.765 | 17.855          | 7.415              | 7.147            | 5.647          | 0.000          |
| <b>19</b>       | 60.170         | 1.765 | 17.855          | 7.415              | 7.147            | 5.647          | 0.000          |
| <b>20</b>       | 60.170         | 1.765 | 17.855          | 7.415              | 7.147            | 5.647          | 0.000          |
| <b>21</b>       | 60.170         | 1.765 | 17.855          | 7.415              | 7.147            | 5.647          | 0.000          |
| <b>22</b>       | 60.170         | 1.765 | 17.855          | 7.415              | 7.147            | 5.647          | 0.000          |
| <b>23</b>       | 60.170         | 1.765 | 17.855          | 7.415              | 7.147            | 5.647          | 0.000          |
| <b>24</b>       | 0.383          | 0.167 | 18.545          | 40.688             | 39.718           | 0.498          | 0.000          |
| <b>25</b>       | 0.383          | 0.167 | 18.545          | 40.688             | 39.718           | 0.498          | 0.000          |
| <b>26</b>       | 0.368          | 0.161 | 18.226          | 41.958             | 38.809           | 0.478          | 0.000          |
| <b>27</b>       | 0.368          | 0.161 | 18.226          | 41.958             | 38.809           | 0.478          | 0.000          |
| <b>28</b>       | 0.000          | 0.001 | 1.285           | 50.041             | 48.671           | 0.002          | 0.000          |
| <b>29</b>       | 0.000          | 0.001 | 1.285           | 50.041             | 48.671           | 0.002          | 0.000          |
| <b>30-WATER</b> | 0.000          | 0.000 | 0.000           | 0.015              | 99.985           | 0.000          | 0.000          |
| <b>31-MEOH</b>  | 0.000          | 0.000 | 0.316           | 99.667             | 0.016            | 0.000          | 0.000          |
| <b>32</b>       | 0.004          | 0.029 | 36.909          | 62.974             | 0.004            | 0.080          | 0.000          |
| <b>33</b>       | 73.238         | 2.115 | 17.704          | 0.142              | 0.028            | 6.772          | 0.000          |
| <b>34</b>       | 73.238         | 2.115 | 17.704          | 0.142              | 0.028            | 6.772          | 0.000          |
| <b>35</b>       | 73.238         | 2.115 | 17.704          | 0.142              | 0.028            | 6.772          | 0.000          |
| <b>36-REC</b>   | 73.238         | 2.115 | 17.704          | 0.142              | 0.028            | 6.772          | 0.000          |
| <b>37</b>       | 1.728          | 0.751 | 80.793          | 12.107             | 2.386            | 2.235          | 0.000          |
| <b>38</b>       | 1.728          | 0.751 | 80.793          | 12.107             | 2.386            | 2.235          | 0.000          |

|               |       |       |        |        |        |       |       |
|---------------|-------|-------|--------|--------|--------|-------|-------|
| <b>39-REC</b> | 1.550 | 0.676 | 76.245 | 17.379 | 2.139  | 2.012 | 0.000 |
| <b>40</b>     | 0.000 | 0.001 | 5.828  | 71.894 | 22.273 | 0.003 | 0.000 |
| <b>41</b>     | 0.000 | 0.001 | 5.828  | 71.894 | 22.273 | 0.003 | 0.000 |

**Table S10.** *(continuation)*

| <b>Stream ID</b> | <b>H<sub>2</sub></b> | <b>CO</b> | <b>CO<sub>2</sub></b> | <b>CH<sub>3</sub>OH</b> | <b>H<sub>2</sub>O</b> | <b>N<sub>2</sub></b> | <b>O<sub>2</sub></b> |
|------------------|----------------------|-----------|-----------------------|-------------------------|-----------------------|----------------------|----------------------|
| <b>42</b>        | 0.001                | 0.004     | 16.991                | 74.209                  | 8.783                 | 0.012                | 0.000                |
| <b>43</b>        | 0.001                | 0.004     | 16.991                | 74.209                  | 8.783                 | 0.012                | 0.000                |
| <b>44-PURGE</b>  | 73.238               | 2.115     | 17.704                | 0.142                   | 0.028                 | 6.772                | 0.000                |
| <b>45-PURGE</b>  | 1.728                | 0.751     | 80.793                | 12.107                  | 2.386                 | 2.235                | 0.000                |
| <b>46-AIR</b>    | 0.000                | 0.000     | 0.000                 | 0.000                   | 0.000                 | 79.000               | 21.000               |
| <b>47</b>        | 0.088                | 0.136     | 8.612                 | 0.000                   | 26.662                | 62.336               | 2.166                |
| <b>48</b>        | 0.088                | 0.136     | 8.612                 | 0.000                   | 26.662                | 62.336               | 2.166                |
| <b>49-FLUE</b>   | 0.088                | 0.136     | 8.612                 | 0.000                   | 26.662                | 62.336               | 2.166                |
| <b>50W</b>       | 0.000                | 0.000     | 0.000                 | 0.000                   | 100.000               | 0.000                | 0.000                |
| <b>51W</b>       | 0.000                | 0.000     | 0.000                 | 0.000                   | 100.000               | 0.000                | 0.000                |
| <b>52W</b>       | 0.000                | 0.000     | 0.000                 | 0.000                   | 100.000               | 0.000                | 0.000                |
| <b>53W</b>       | 0.000                | 0.000     | 0.000                 | 0.000                   | 100.000               | 0.000                | 0.000                |
| <b>54W</b>       | 0.000                | 0.000     | 0.000                 | 0.000                   | 100.000               | 0.000                | 0.000                |
| <b>55W</b>       | 0.000                | 0.000     | 0.000                 | 0.000                   | 100.000               | 0.000                | 0.000                |
| <b>56W</b>       | 0.000                | 0.000     | 0.000                 | 0.000                   | 100.000               | 0.000                | 0.000                |
| <b>57W</b>       | 0.000                | 0.000     | 0.000                 | 0.000                   | 100.000               | 0.000                | 0.000                |
| <b>58W</b>       | 0.000                | 0.000     | 0.000                 | 0.000                   | 100.000               | 0.000                | 0.000                |
| <b>59W</b>       | 0.000                | 0.000     | 0.000                 | 0.000                   | 100.000               | 0.000                | 0.000                |
| <b>60W</b>       | 0.000                | 0.000     | 0.000                 | 0.000                   | 100.000               | 0.000                | 0.000                |
| <b>61W</b>       | 0.000                | 0.000     | 0.000                 | 0.000                   | 100.000               | 0.000                | 0.000                |

## F. Three-step process – Simulation in Aspen Plus and stream properties

In Figure S2, a detailed flowsheet of the three-step methanol synthesis plant implemented in Aspen Plus is presented. Feed CO<sub>2</sub> (1-CO<sub>2</sub>, 4655 kmol·h<sup>-1</sup>) is mixed with a recycle stream (58-REC, 1927 kmol·h<sup>-1</sup>) (MIXER1), which mainly consists of CO<sub>2</sub> (70% mol/mol), methanol (19% mol/mol), and nitrogen (6%), and has low amounts of other components. Similarly to the previous approach, CO<sub>2</sub> is compressed in a three-stage process from 1 to 70 bar (CP1-CO<sub>2</sub>, CP2-CO<sub>2</sub>, CP3-CO<sub>2</sub>), with intermediate cooling (HE1 and HE2) and intermediate phase separation (FLASH 1 at 30 °C and 4.12 bar, FLASH2 at 45 °C and 16.98 bar).

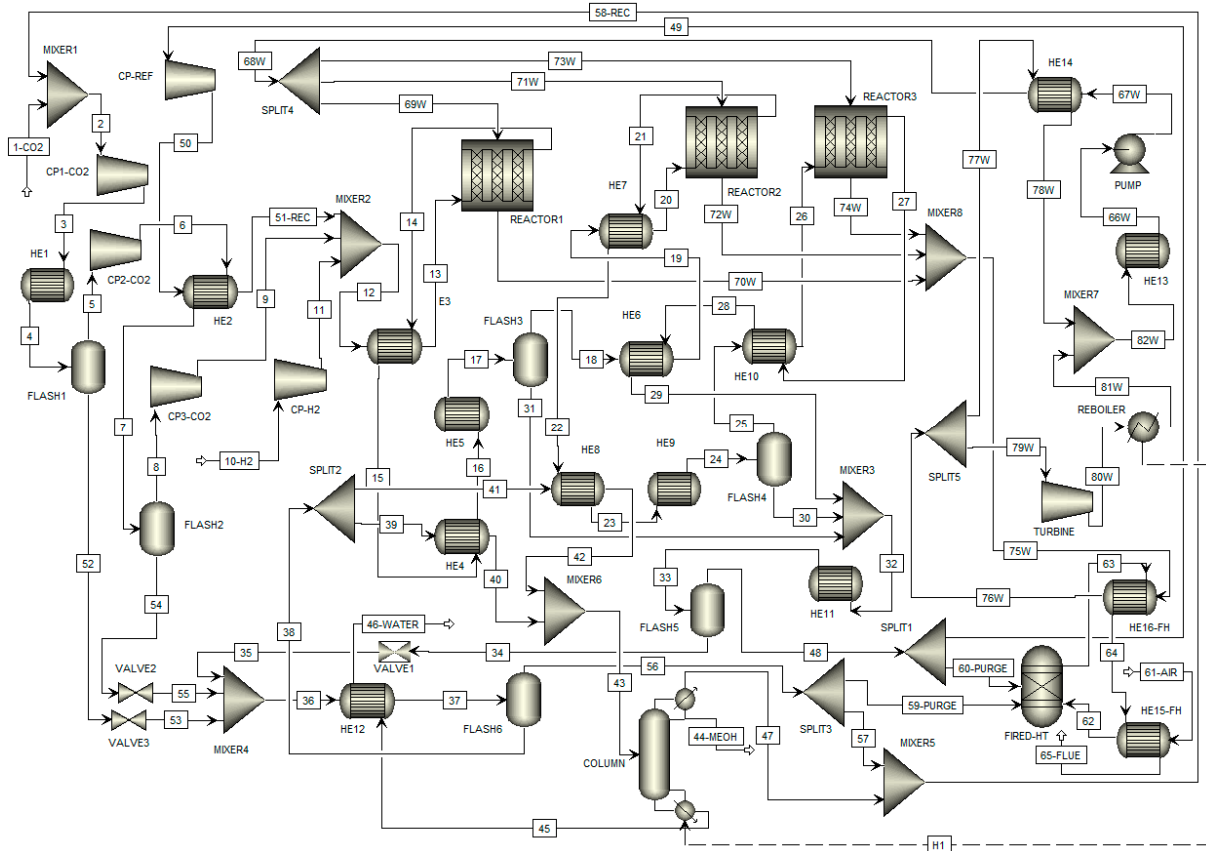

**Figure S2.** Three-step process – Aspen Plus flowsheet.

Hydrogen (10-H<sub>2</sub>, 13964 kmol·h<sup>-1</sup>) is compressed in a single stage from 30 to 70 bar (CP-H<sub>2</sub>). Hydrogen (11) and CO<sub>2</sub> (9) are mixed (MIXER2) with a pressurized recycle stream (51-REC, 20654 kmol·h<sup>-1</sup>), which is rich in H<sub>2</sub> (69% mol/mol), N<sub>2</sub> (16% mol/mol), and CO<sub>2</sub> (12% mol/mol).

The mixed stream (12) is pre-heated with the first product stream (14) up to 248.5 °C (HE3), and enters Reactor 1. The reactor cooling is performed with water at 248.5 °C and 45.75 bar



( $T_{\text{boiling}} = 258.5\text{ }^{\circ}\text{C}$ ). Reactor setpoint temperature ( $258.5\text{ }^{\circ}\text{C}$ ) is rapidly achieved by both phases ( $z = 0.75\text{ m}$ ), after which isothermal conditions are maintained ( $\Delta T_{\text{max}} < 3\text{ }^{\circ}\text{C}$ ). Similar temperature profiles occur in Reactors 2 and 3.

The first product stream (14) is cooled down to  $45\text{ }^{\circ}\text{C}$  in three stages: first by the first feed stream (12) (HE3), second by a fraction of the column feed (39) (HE4), and finally by cooling water (HE5). A phase separation of the cooled stream (17) occurs in flash drum (FLASH3,  $45\text{ }^{\circ}\text{C}$  and  $69.25\text{ bar}$ ), where most water (98.8%) and methanol (94.7%), as well as some  $\text{CO}_2$  (9.3%) remain in the liquid stream (31).

The remaining gas stream (18) is warmed back to  $248.5\text{ }^{\circ}\text{C}$  in two stages: first by the third product stream (28) (HE6), and then by the second product stream (21) (HE7). The warmed stream (20) enters Reactor 2, where similar cooling to the first reactor is applied. The product stream (21) is cooled down to  $30\text{ }^{\circ}\text{C}$  in three stages: first by the second reactor feed (19) (HE7), second by a fraction of the column feed (41) (HE8), and finally by cooling water (HE9). Then, a phase separation occurs (FLASH4,  $30\text{ }^{\circ}\text{C}$  and  $68.5\text{ bar}$ ), where most water (99.5%), methanol (97.5%), as well as some  $\text{CO}_2$  (12.6%) remain in the liquid stream (30).

The gas stream (25) is heated to  $248.5\text{ }^{\circ}\text{C}$  by the third product stream (27) (HE10). The warmed stream (26) enters Reactor 3, with similar cooling to the other ones. The product stream (27) is cooled by the third reactor feed (25) (HE10), and then by the gas stream of flash drum 3 (18) (HE6). After that, the third product stream (29) is mixed with the liquid streams from the intermediate condensation steps (30 and 31) (MIXER3), and the mixture is cooled down to  $30\text{ }^{\circ}\text{C}$  with cooling water (HE11). A phase separation occurs (FLASH5,  $30\text{ }^{\circ}\text{C}$  and  $67.75\text{ bar}$ ), where most water (99.9%), methanol (99.3%), and a significant amount of  $\text{CO}_2$  (34.5%) remain in the liquid stream (34).

The gas stream (48) has a 2% purge (60-PURGE,  $422\text{ kmol}\cdot\text{h}^{-1}$ ). The remaining recycle stream (49) is recompressed to  $70\text{ bar}$  (CP-REC), and pre-heated by feed  $\text{CO}_2$  (6) (HE2). Then, the recycle stream (51-REC,  $20654\text{ kmol}\cdot\text{h}^{-1}$ ) is mixed with the compressed feed streams (MIXER2).

The liquid stream from flash drum 5 (34) has a pressure reduction to  $1\text{ bar}$  in a choke valve (VALVE1), and is mixed with the liquid fraction from the flash drums 1-2 (53 and 55) (MIXER4). The mixed stream (36) is slightly heated to  $30\text{ }^{\circ}\text{C}$  with boiling water from the column (45) (HE12), and then a phase separation occurs (FLASH6,  $30\text{ }^{\circ}\text{C}$  and  $1\text{ bar}$ ). Most of the water (99.1%) and the methanol (95.8%) from the feed stream are recovered in the liquid phase, as well as some  $\text{CO}_2$  (8.1%).

The gas stream (56) has a 2% purge (59-PURGE,  $34 \text{ kmol}\cdot\text{h}^{-1}$ ). The remaining recycle stream (57) is mixed with the gas distillate (47) (MIXER5), and the resulting stream (58-REC,  $1927 \text{ kmol}\cdot\text{h}^{-1}$ ) is mixed with feed  $\text{CO}_2$  (1) (MIXER1).

The liquid stream from flash drum 6 (38) is split into two parts (stream 39 with 65%, stream 41 with 35%), and these resulting streams are heated in parallel (HE4, HE8) with the first and the second product streams (15 and 22, respectively). The warmed streams (40 and 42) are mixed (MIXER6) and fed to the distillation column, which has a partial vapor-liquid condenser at  $53^\circ\text{C}$  and a kettle reboiler at  $99.6^\circ\text{C}$ . The column has 30 stages, a reflux ratio of 2, and the feed enters above the 24<sup>th</sup> stage. Water as bottom stream (stream 45,  $4563 \text{ kmol}\cdot\text{h}^{-1}$ ) and methanol as liquid distillate (44-MEOH,  $4540 \text{ kmol}\cdot\text{h}^{-1}$ ) are obtained in a purity of 99.99% mol/mol and 99.67% mol/mol, respectively. The gas distillate is mainly composed of methanol (62.97% mol/mol) and  $\text{CO}_2$  (36.68% mol/mol).

The purge streams (59-PURGE, 60-PURGE) are burned in a fired heater with air (61-AIR,  $873 \text{ kmol}\cdot\text{h}^{-1}$ ) at 15% excess, the latter being pre-heated with the flue gas (64) (HE15-FH).

Similarly to the one-step process, a water Rankine cycle is also present in this approach. Condensed water at  $99.6^\circ\text{C}$  and 1 bar (66W,  $7680 \text{ kmol}\cdot\text{h}^{-1}$ ) is pumped to 45.75 bar. Compressed water (67W) is heated up to  $248.5^\circ\text{C}$  with superheated vapor (77W) (HE14). The warmed water (68W,  $T_{\text{boiling}} = 258.5^\circ\text{C}$ ) is split into three fractions, and each one is fed to a reactor as cooling fluid. The split fraction are chosen according to the heat duty from each respective reactor, that is: 27.7% for Reactor 1, 38.4% for Reactor 2, and 33.9% for Reactor 3. The saturated steams (70W, 72W, 74W), which were vaporized with the reaction enthalpy, are mixed (MIXER8) and further heated in the fired heater up to  $513^\circ\text{C}$  (HE16-FH). The supersaturated steam (76W) is split into two fractions. The first one (77W,  $2077 \text{ kmol}\cdot\text{h}^{-1}$ ) is used to pre-heat the water that flows to the reactors (67W) (HE14), while the second one (79W,  $5602 \text{ kmol}\cdot\text{h}^{-1}$ ) generates 20.94 MW of work in a turbine. Low pressure steam (80W) leaves the turbine at  $123^\circ\text{C}$  and 1.43 bar and enters the reboiler of the distillation column as the hot fluid. This is simulated in Aspen Plus with a Heat unit and a heat stream (H1). Finally, a water stream (81W) at  $110^\circ\text{C}$ , 1.43 bar and a vapor fraction of 0.105 is mixed with the water stream from heat exchanger 14 (78W) (MIXER7), and the mixed stream (82W) is fully condensed (HE13), completing the cycle.

**Table S11.** Properties of the streams from the three-step process.

| Stream ID       | Mole flow<br>[kmol·h <sup>-1</sup> ] | Mass<br>flow<br>[t·h <sup>-1</sup> ] | Temp.<br>[°C] | Pressure<br>[bar] | Mole enthalpy<br>[MJ·kmol <sup>-1</sup> ] | Mole entropy<br>[kJ·kmol <sup>-1</sup> ·K <sup>-1</sup> ] | Total<br>Exergy<br>[MJ·kmol <sup>-1</sup> ] |
|-----------------|--------------------------------------|--------------------------------------|---------------|-------------------|-------------------------------------------|-----------------------------------------------------------|---------------------------------------------|
| <b>1-CO2</b>    | 4655                                 | 204.3                                | 25.0          | 1.00              | -392.75                                   | 3.02                                                      | 0.0                                         |
| <b>2</b>        | 6582                                 | 279.8                                | 27.5          | 1.00              | -370.74                                   | -0.89                                                     | 78.7                                        |
| <b>3</b>        | 6582                                 | 279.8                                | 155.6         | 4.12              | -365.58                                   | 1.59                                                      | 86.8                                        |
| <b>4</b>        | 6582                                 | 279.8                                | 30.0          | 4.12              | -371.65                                   | -15.58                                                    | 85.1                                        |
| <b>5</b>        | 6406                                 | 274.6                                | 30.0          | 4.12              | -374.75                                   | -10.38                                                    | 60.0                                        |
| <b>6</b>        | 6406                                 | 274.6                                | 159.1         | 16.98             | -369.54                                   | -7.90                                                     | 68.0                                        |
| <b>7</b>        | 6406                                 | 274.6                                | 45.0          | 16.98             | -374.99                                   | -22.79                                                    | 66.2                                        |
| <b>8</b>        | 6239                                 | 269.1                                | 45.0          | 16.98             | -377.87                                   | -18.39                                                    | 41.3                                        |
| <b>9</b>        | 6239                                 | 269.1                                | 178.5         | 70.00             | -372.42                                   | -15.90                                                    | 49.4                                        |
| <b>10-H2</b>    | 13964                                | 30.0                                 | 25.0          | 30.00             | 0.00                                      | -27.91                                                    | 1135.6                                      |
| <b>11</b>       | 13964                                | 30.0                                 | 127.4         | 70.00             | 2.97                                      | -26.38                                                    | 1145.4                                      |
| <b>12</b>       | 40857                                | 545.2                                | 122.3         | 70.00             | -80.39                                    | -18.34                                                    | 2439.9                                      |
| <b>13</b>       | 40857                                | 545.2                                | 248.5         | 70.00             | -76.20                                    | -9.14                                                     | 2456.3                                      |
| <b>14</b>       | 37619                                | 545.2                                | 259.4         | 69.25             | -84.52                                    | -12.09                                                    | 2387.1                                      |
| <b>15</b>       | 37619                                | 545.2                                | 138.1         | 69.25             | -89.08                                    | -21.88                                                    | 2370.1                                      |
| <b>16</b>       | 37619                                | 545.2                                | 60.0          | 69.25             | -94.99                                    | -37.62                                                    | 2357.3                                      |
| <b>17</b>       | 37619                                | 545.2                                | 45.0          | 69.25             | -95.54                                    | -39.05                                                    | 2353.8                                      |
| <b>18</b>       | 33222                                | 427.0                                | 45.0          | 69.25             | -71.44                                    | -22.73                                                    | 2012.5                                      |
| <b>19</b>       | 33222                                | 427.0                                | 90.5          | 69.25             | -70.03                                    | -18.61                                                    | 2014.1                                      |
| <b>20</b>       | 33222                                | 427.0                                | 248.5         | 69.25             | -65.02                                    | -7.17                                                     | 2028.9                                      |
| <b>21</b>       | 30048                                | 426.9                                | 259.4         | 68.50             | -74.94                                    | -12.82                                                    | 1962.2                                      |
| <b>22</b>       | 30048                                | 426.9                                | 125.1         | 68.50             | -80.48                                    | -25.08                                                    | 1946.4                                      |
| <b>23</b>       | 30048                                | 426.9                                | 65.0          | 68.50             | -85.02                                    | -37.32                                                    | 1939.0                                      |
| <b>24</b>       | 30049                                | 426.9                                | 30.0          | 68.50             | -86.55                                    | -41.76                                                    | 1935.1                                      |
| <b>25</b>       | 26387                                | 323.5                                | 30.0          | 68.50             | -60.12                                    | -24.05                                                    | 1602.1                                      |
| <b>26</b>       | 26387                                | 323.5                                | 248.5         | 68.50             | -53.34                                    | -7.23                                                     | 1615.1                                      |
| <b>27</b>       | 23738                                | 323.5                                | 259.0         | 67.75             | -62.71                                    | -13.64                                                    | 1559.4                                      |
| <b>28</b>       | 23738                                | 323.5                                | 100.5         | 67.75             | -70.26                                    | -31.14                                                    | 1544.1                                      |
| <b>29</b>       | 23738                                | 323.5                                | 72.0          | 67.75             | -72.22                                    | -36.59                                                    | 1541.8                                      |
| <b>30</b>       | 3661                                 | 103.4                                | 30.0          | 68.50             | -276.99                                   | -169.43                                                   | 333.0                                       |
| <b>31</b>       | 4397                                 | 118.3                                | 45.0          | 69.25             | -277.64                                   | -162.34                                                   | 341.3                                       |
| <b>32</b>       | 31796                                | 545.2                                | 59.6          | 67.75             | -124.21                                   | -69.10                                                    | 2217.0                                      |
| <b>33</b>       | 31796                                | 545.2                                | 30.0          | 67.75             | -125.88                                   | -74.13                                                    | 2212.6                                      |
| <b>34</b>       | 10721                                | 294.1                                | 30.0          | 67.75             | -274.41                                   | -171.56                                                   | 944.0                                       |
| <b>35</b>       | 10721                                | 294.1                                | 21.5          | 1.00              | -274.41                                   | -169.30                                                   | 942.0                                       |
| <b>36</b>       | 11064                                | 304.7                                | 21.7          | 1.00              | -274.05                                   | -170.03                                                   | 991.6                                       |
| <b>37</b>       | 11064                                | 304.7                                | 30.0          | 1.00              | -273.01                                   | -166.60                                                   | 991.7                                       |
| <b>38</b>       | 9368                                 | 237.5                                | 30.0          | 1.00              | -263.55                                   | -195.79                                                   | 945.6                                       |
| <b>39</b>       | 6089                                 | 154.4                                | 30.0          | 1.00              | -263.55                                   | -195.79                                                   | 614.6                                       |
| <b>40</b>       | 6089                                 | 154.4                                | 81.8          | 1.00              | -227.00                                   | -90.43                                                    | 623.3                                       |
| <b>41</b>       | 3279                                 | 83.1                                 | 30.0          | 1.00              | -263.55                                   | -195.79                                                   | 331.0                                       |
| <b>42</b>       | 3279                                 | 83.1                                 | 83.7          | 1.00              | -221.93                                   | -76.18                                                    | 336.4                                       |
| <b>43</b>       | 9368                                 | 237.5                                | 82.5          | 1.00              | -225.22                                   | -85.43                                                    | 959.7                                       |
| <b>44-MEOH</b>  | 4540                                 | 145.6                                | 53.0          | 1.00              | -236.17                                   | -231.08                                                   | 912.2                                       |
| <b>45</b>       | 4563                                 | 82.2                                 | 99.6          | 1.00              | -280.00                                   | -145.98                                                   | 0.9                                         |
| <b>46-WATER</b> | 4563                                 | 82.2                                 | 67.8          | 1.00              | -282.55                                   | -153.01                                                   | 0.4                                         |
| <b>47</b>       | 265                                  | 9.6                                  | 53.0          | 1.00              | -269.76                                   | -70.90                                                    | 33.7                                        |
| <b>48</b>       | 21075                                | 251.2                                | 30.0          | 67.75             | -50.33                                    | -24.57                                                    | 1268.6                                      |

**Table S11.** *(continuation)*

| Stream ID       | Mole flow<br>[kmol·h <sup>-1</sup> ] | Mass<br>flow<br>[t·h <sup>-1</sup> ] | Temp.<br>[°C] | Pressure<br>[bar] | Mole enthalpy<br>[MJ·kmol <sup>-1</sup> ] | Mole entropy<br>[kJ·kmol <sup>-1</sup> ·K <sup>-1</sup> ] | Total<br>Exergy<br>[MJ·kmol <sup>-1</sup> ] |
|-----------------|--------------------------------------|--------------------------------------|---------------|-------------------|-------------------------------------------|-----------------------------------------------------------|---------------------------------------------|
| <b>49</b>       | 20654                                | 246.1                                | 30.0          | 67.75             | -50.33                                    | -24.57                                                    | 1243.2                                      |
| <b>50</b>       | 20654                                | 246.1                                | 33.5          | 70.00             | -50.23                                    | -24.50                                                    | 1243.7                                      |
| <b>51-REC</b>   | 20654                                | 246.1                                | 89.3          | 70.00             | -48.54                                    | -19.44                                                    | 1244.8                                      |
| <b>52</b>       | 176                                  | 5.2                                  | 30.0          | 4.12              | -258.84                                   | -204.42                                                   | 24.9                                        |
| <b>53</b>       | 176                                  | 5.2                                  | 25.9          | 1.00              | -258.84                                   | -204.01                                                   | 24.9                                        |
| <b>54</b>       | 167                                  | 5.5                                  | 45.0          | 16.98             | -267.39                                   | -187.51                                                   | 24.8                                        |
| <b>55</b>       | 167                                  | 5.5                                  | 29.3          | 1.00              | -267.39                                   | -184.22                                                   | 24.7                                        |
| <b>56</b>       | 1696                                 | 67.2                                 | 30.0          | 1.00              | -325.19                                   | -5.35                                                     | 46.1                                        |
| <b>57</b>       | 1662                                 | 65.9                                 | 30.0          | 1.00              | -325.19                                   | -5.35                                                     | 45.2                                        |
| <b>58-REC</b>   | 1927                                 | 75.5                                 | 34.0          | 1.00              | -317.58                                   | -13.64                                                    | 78.8                                        |
| <b>59-PURGE</b> | 34                                   | 1.3                                  | 30.0          | 1.00              | -325.19                                   | -5.35                                                     | 0.9                                         |
| <b>60-PURGE</b> | 422                                  | 5.0                                  | 30.0          | 67.75             | -50.33                                    | -24.57                                                    | 25.4                                        |
| <b>61-AIR</b>   | 873                                  | 25.2                                 | 25.0          | 1.00              | 0.00                                      | 4.38                                                      | 0.0                                         |
| <b>62</b>       | 873                                  | 25.2                                 | 258.5         | 1.00              | 6.90                                      | 21.44                                                     | 0.4                                         |
| <b>63</b>       | 1181                                 | 31.5                                 | 1879.5        | 1.00              | -22.21                                    | 67.16                                                     | 16.5                                        |
| <b>64</b>       | 1181                                 | 31.5                                 | 283.5         | 1.00              | -83.55                                    | 16.68                                                     | 1.4                                         |
| <b>65-FLUE</b>  | 1181                                 | 31.5                                 | 124.4         | 1.00              | -88.65                                    | 5.91                                                      | 0.7                                         |
| <b>66W</b>      | 7680                                 | 138.4                                | 99.6          | 1.00              | -280.01                                   | -145.97                                                   | 1.4                                         |
| <b>67W</b>      | 7680                                 | 138.4                                | 101.2         | 45.75             | -279.88                                   | -145.65                                                   | 1.5                                         |
| <b>68W</b>      | 7680                                 | 138.4                                | 248.5         | 45.75             | -265.14                                   | -114.97                                                   | 13.4                                        |
| <b>69W</b>      | 2129                                 | 38.4                                 | 248.5         | 45.75             | -265.14                                   | -114.97                                                   | 3.7                                         |
| <b>70W</b>      | 2129                                 | 38.4                                 | 258.5         | 45.75             | -233.85                                   | -56.37                                                    | 11.9                                        |
| <b>71W</b>      | 2951                                 | 53.2                                 | 248.5         | 45.75             | -265.14                                   | -114.97                                                   | 5.2                                         |
| <b>72W</b>      | 2951                                 | 53.2                                 | 258.5         | 45.75             | -234.04                                   | -56.73                                                    | 16.4                                        |
| <b>73W</b>      | 2600                                 | 46.8                                 | 248.5         | 45.75             | -265.14                                   | -114.97                                                   | 4.6                                         |
| <b>74W</b>      | 2600                                 | 46.8                                 | 258.5         | 45.75             | -233.86                                   | -56.40                                                    | 14.5                                        |
| <b>75W</b>      | 7680                                 | 138.4                                | 258.5         | 45.75             | -233.92                                   | -56.52                                                    | 42.8                                        |
| <b>76W</b>      | 7680                                 | 138.4                                | 509.3         | 45.75             | -224.49                                   | -41.98                                                    | 53.7                                        |
| <b>77W</b>      | 2077                                 | 37.4                                 | 509.3         | 45.75             | -224.49                                   | -41.98                                                    | 14.5                                        |
| <b>78W</b>      | 2077                                 | 37.4                                 | 111.8         | 45.75             | -279.00                                   | -143.37                                                   | 0.5                                         |
| <b>79W</b>      | 5602                                 | 100.9                                | 509.3         | 45.75             | -224.49                                   | -41.98                                                    | 39.2                                        |
| <b>80W</b>      | 5602                                 | 100.9                                | 120.4         | 1.43              | -238.59                                   | -37.90                                                    | 15.4                                        |
| <b>81W</b>      | 5602                                 | 100.9                                | 110.0         | 1.43              | -274.91                                   | -132.69                                                   | 2.8                                         |
| <b>82W</b>      | 7680                                 | 138.4                                | 110.0         | 1.43              | -276.02                                   | -135.58                                                   | 3.3                                         |

**Table S12.** Molar composition (% mol/mol) of the streams from the three-step process.

| Stream ID       | H <sub>2</sub> | CO    | CO <sub>2</sub> | CH <sub>3</sub> OH | H <sub>2</sub> O | N <sub>2</sub> | O <sub>2</sub> |
|-----------------|----------------|-------|-----------------|--------------------|------------------|----------------|----------------|
| <b>1-CO2</b>    | 0.000          | 0.000 | 99.500          | 0.000              | 0.500            | 0.000          | 0.000          |
| <b>2</b>        | 0.575          | 0.310 | 90.708          | 5.592              | 0.957            | 1.858          | 0.000          |
| <b>3</b>        | 0.575          | 0.310 | 90.708          | 5.592              | 0.957            | 1.858          | 0.000          |
| <b>4</b>        | 0.575          | 0.310 | 90.708          | 5.592              | 0.957            | 1.858          | 0.000          |
| <b>5</b>        | 0.590          | 0.318 | 93.045          | 3.814              | 0.322            | 1.909          | 0.000          |
| <b>6</b>        | 0.590          | 0.318 | 93.045          | 3.814              | 0.322            | 1.909          | 0.000          |
| <b>7</b>        | 0.590          | 0.318 | 93.045          | 3.814              | 0.322            | 1.909          | 0.000          |
| <b>8</b>        | 0.606          | 0.327 | 95.083          | 1.950              | 0.075            | 1.960          | 0.000          |
| <b>9</b>        | 0.606          | 0.327 | 95.083          | 1.950              | 0.075            | 1.960          | 0.000          |
| <b>10-H2</b>    | 99.500         | 0.000 | 0.000           | 0.000              | 0.000            | 0.500          | 0.000          |
| <b>11</b>       | 99.500         | 0.000 | 0.000           | 0.000              | 0.000            | 0.500          | 0.000          |
| <b>12</b>       | 69.148         | 1.301 | 20.603          | 0.376              | 0.027            | 8.545          | 0.000          |
| <b>13</b>       | 69.148         | 1.301 | 20.603          | 0.376              | 0.027            | 8.545          | 0.000          |
| <b>14</b>       | 60.953         | 2.651 | 16.835          | 4.711              | 5.570            | 9.279          | 0.000          |
| <b>15</b>       | 60.953         | 2.651 | 16.835          | 4.711              | 5.570            | 9.279          | 0.000          |
| <b>16</b>       | 60.953         | 2.651 | 16.835          | 4.711              | 5.570            | 9.279          | 0.000          |
| <b>17</b>       | 60.953         | 2.651 | 16.835          | 4.711              | 5.570            | 9.279          | 0.000          |
| <b>18</b>       | 68.971         | 2.974 | 17.283          | 0.283              | 0.074            | 10.415         | 0.000          |
| <b>19</b>       | 68.971         | 2.974 | 17.283          | 0.283              | 0.074            | 10.415         | 0.000          |
| <b>20</b>       | 68.971         | 2.974 | 17.283          | 0.283              | 0.074            | 10.415         | 0.000          |
| <b>21</b>       | 61.037         | 2.664 | 14.451          | 5.594              | 4.739            | 11.515         | 0.000          |
| <b>22</b>       | 61.037         | 2.664 | 14.451          | 5.594              | 4.739            | 11.515         | 0.000          |
| <b>23</b>       | 61.037         | 2.664 | 14.451          | 5.594              | 4.739            | 11.515         | 0.000          |
| <b>24</b>       | 61.037         | 2.664 | 14.451          | 5.594              | 4.739            | 11.515         | 0.000          |
| <b>25</b>       | 69.456         | 3.001 | 14.377          | 0.157              | 0.028            | 12.982         | 0.000          |
| <b>26</b>       | 69.456         | 3.001 | 14.377          | 0.157              | 0.028            | 12.982         | 0.000          |
| <b>27</b>       | 61.594         | 2.209 | 11.528          | 5.754              | 4.484            | 14.431         | 0.000          |
| <b>28</b>       | 61.594         | 2.209 | 11.528          | 5.754              | 4.484            | 14.431         | 0.000          |
| <b>29</b>       | 61.594         | 2.209 | 11.528          | 5.754              | 4.484            | 14.431         | 0.000          |
| <b>30</b>       | 0.362          | 0.236 | 14.984          | 44.780             | 38.689           | 0.949          | 0.000          |
| <b>31</b>       | 0.370          | 0.213 | 13.448          | 38.169             | 47.100           | 0.699          | 0.000          |
| <b>32</b>       | 46.077         | 1.706 | 12.192          | 14.731             | 14.316           | 10.979         | 0.000          |
| <b>33</b>       | 46.077         | 1.706 | 12.192          | 14.731             | 14.316           | 10.979         | 0.000          |
| <b>34</b>       | 0.360          | 0.194 | 12.500          | 43.384             | 42.399           | 1.164          | 0.000          |
| <b>35</b>       | 0.360          | 0.194 | 12.500          | 43.384             | 42.399           | 1.164          | 0.000          |
| <b>36</b>       | 0.349          | 0.188 | 12.458          | 44.266             | 41.612           | 1.128          | 0.000          |
| <b>37</b>       | 0.349          | 0.188 | 12.458          | 44.266             | 41.612           | 1.128          | 0.000          |
| <b>38</b>       | 0.000          | 0.001 | 1.188           | 50.087             | 48.715           | 0.008          | 0.000          |
| <b>39</b>       | 0.000          | 0.001 | 1.188           | 50.087             | 48.715           | 0.008          | 0.000          |
| <b>40</b>       | 0.000          | 0.001 | 1.188           | 50.087             | 48.715           | 0.008          | 0.000          |
| <b>41</b>       | 0.000          | 0.001 | 1.188           | 50.087             | 48.715           | 0.008          | 0.000          |
| <b>42</b>       | 0.000          | 0.001 | 1.188           | 50.087             | 48.715           | 0.008          | 0.000          |
| <b>43</b>       | 0.000          | 0.001 | 1.188           | 50.087             | 48.715           | 0.008          | 0.000          |
| <b>44-MEOH</b>  | 0.000          | 0.000 | 0.314           | 99.668             | 0.017            | 0.000          | 0.000          |
| <b>45</b>       | 0.000          | 0.000 | 0.000           | 0.010              | 99.990           | 0.000          | 0.000          |
| <b>46-WATER</b> | 0.000          | 0.000 | 0.000           | 0.010              | 99.990           | 0.000          | 0.000          |
| <b>47</b>       | 0.006          | 0.051 | 36.679          | 62.974             | 0.004            | 0.285          | 0.000          |
| <b>48</b>       | 69.332         | 2.474 | 12.035          | 0.155              | 0.030            | 15.973         | 0.000          |

**Table S12.** *(continuation)*

| Stream ID       | H <sub>2</sub> | CO    | CO <sub>2</sub> | CH <sub>3</sub> OH | H <sub>2</sub> O | N <sub>2</sub> | O <sub>2</sub> |
|-----------------|----------------|-------|-----------------|--------------------|------------------|----------------|----------------|
| <b>49</b>       | 69.332         | 2.474 | 12.035          | 0.155              | 0.030            | 15.973         | 0.000          |
| <b>50</b>       | 69.332         | 2.474 | 12.035          | 0.155              | 0.030            | 15.973         | 0.000          |
| <b>51-REC</b>   | 69.332         | 2.474 | 12.035          | 0.155              | 0.030            | 15.973         | 0.000          |
| <b>52</b>       | 0.000          | 0.001 | 5.785           | 70.187             | 24.018           | 0.008          | 0.000          |
| <b>53</b>       | 0.000          | 0.001 | 5.785           | 70.187             | 24.018           | 0.008          | 0.000          |
| <b>54</b>       | 0.001          | 0.005 | 16.820          | 73.579             | 9.565            | 0.030          | 0.000          |
| <b>55</b>       | 0.001          | 0.005 | 16.820          | 73.579             | 9.565            | 0.030          | 0.000          |
| <b>56</b>       | 2.274          | 1.218 | 74.689          | 12.118             | 2.388            | 7.313          | 0.000          |
| <b>57</b>       | 2.274          | 1.218 | 74.689          | 12.118             | 2.388            | 7.313          | 0.000          |
| <b>58-REC</b>   | 1.963          | 1.058 | 69.470          | 19.100             | 2.061            | 6.348          | 0.000          |
| <b>59-PURGE</b> | 2.274          | 1.218 | 74.689          | 12.118             | 2.388            | 7.313          | 0.000          |
| <b>60-PURGE</b> | 69.332         | 2.474 | 12.035          | 0.155              | 0.030            | 15.973         | 0.000          |
| <b>61-AIR</b>   | 0.000          | 0.000 | 0.000           | 0.000              | 0.000            | 79.000         | 21.000         |
| <b>62</b>       | 0.000          | 0.000 | 0.000           | 0.000              | 0.000            | 79.000         | 21.000         |
| <b>63</b>       | 0.145          | 0.216 | 7.548           | 0.000              | 25.558           | 64.303         | 2.230          |
| <b>64</b>       | 0.145          | 0.216 | 7.548           | 0.000              | 25.558           | 64.303         | 2.230          |
| <b>65-FLUE</b>  | 0.145          | 0.216 | 7.548           | 0.000              | 25.558           | 64.303         | 2.230          |
| <b>66W</b>      | 0.000          | 0.000 | 0.000           | 0.000              | 100.000          | 0.000          | 0.000          |
| <b>67W</b>      | 0.000          | 0.000 | 0.000           | 0.000              | 100.000          | 0.000          | 0.000          |
| <b>68W</b>      | 0.000          | 0.000 | 0.000           | 0.000              | 100.000          | 0.000          | 0.000          |
| <b>69W</b>      | 0.000          | 0.000 | 0.000           | 0.000              | 100.000          | 0.000          | 0.000          |
| <b>70W</b>      | 0.000          | 0.000 | 0.000           | 0.000              | 100.000          | 0.000          | 0.000          |
| <b>71W</b>      | 0.000          | 0.000 | 0.000           | 0.000              | 100.000          | 0.000          | 0.000          |
| <b>72W</b>      | 0.000          | 0.000 | 0.000           | 0.000              | 100.000          | 0.000          | 0.000          |
| <b>73W</b>      | 0.000          | 0.000 | 0.000           | 0.000              | 100.000          | 0.000          | 0.000          |
| <b>74W</b>      | 0.000          | 0.000 | 0.000           | 0.000              | 100.000          | 0.000          | 0.000          |
| <b>75W</b>      | 0.000          | 0.000 | 0.000           | 0.000              | 100.000          | 0.000          | 0.000          |
| <b>76W</b>      | 0.000          | 0.000 | 0.000           | 0.000              | 100.000          | 0.000          | 0.000          |
| <b>77W</b>      | 0.000          | 0.000 | 0.000           | 0.000              | 100.000          | 0.000          | 0.000          |
| <b>78W</b>      | 0.000          | 0.000 | 0.000           | 0.000              | 100.000          | 0.000          | 0.000          |
| <b>79W</b>      | 0.000          | 0.000 | 0.000           | 0.000              | 100.000          | 0.000          | 0.000          |
| <b>80W</b>      | 0.000          | 0.000 | 0.000           | 0.000              | 100.000          | 0.000          | 0.000          |
| <b>81W</b>      | 0.000          | 0.000 | 0.000           | 0.000              | 100.000          | 0.000          | 0.000          |
| <b>82W</b>      | 0.000          | 0.000 | 0.000           | 0.000              | 100.000          | 0.000          | 0.000          |

## G. Equipment dimensioning

### G.1 Flash drum

According to Towler & Sinnott,[6] the diameter ( $D$ ) of a flash drum with a demister pad can be estimated by following equation:

$$D = \sqrt{\frac{4 \cdot \dot{V}_g}{\pi \cdot u_t}} \quad (\text{S39})$$

Where  $\dot{V}_g$  is the gas volumetric flow rate ( $\text{m}^3 \cdot \text{s}^{-1}$ ) and  $u_t$  is the settling velocity of the liquid droplets, which is estimated as follows:

$$u_t = 0.07 \cdot \sqrt{\frac{\rho_L - \rho_g}{\rho_g}} \quad (\text{S40})$$

Here,  $\rho_L$  and  $\rho_g$  are the liquid the gas densities ( $\text{kg} \cdot \text{m}^{-3}$ ).

According to Towler & Sinnott,[6] the adequate height ( $H$ , in m) of the flash drum is estimated as follows:

$$H = 1.5 \cdot D + 0.5 + \frac{\dot{V}_L}{A_c} \cdot t_h \quad (\text{S41})$$

Where  $\dot{V}_L$  is the liquid volumetric flow rate ( $\text{m}^3 \cdot \text{s}^{-1}$ ),  $A_c$  is the cross section area ( $\text{m}^2$ ), and  $t_h$  is the liquid hold up time (s), which is typically 10 minutes for low viscous fluids.

The estimated dimensions of the flash drums are summarized in Table S13.

**Table S13.** Dimension of the flash drums of the one-step and the three-step processes.

| Process    | Equipment | Diameter (m) | Height (m) | Volume ( $\text{m}^3$ ) |
|------------|-----------|--------------|------------|-------------------------|
| One-step   | Flash 1   | 4.59         | 7.48       | 123.5                   |
|            | Flash 2   | 3.25         | 5.54       | 46.0                    |
|            | Flash 3   | 4.33         | 11.18      | 164.8                   |
|            | Flash 4   | 3.77         | 10.37      | 115.6                   |
| Three-step | Flash 1   | 4.28         | 6.99       | 100.6                   |
|            | Flash 2   | 3.04         | 5.21       | 37.7                    |
|            | Flash 3   | 3.59         | 8.14       | 82.6                    |
|            | Flash 4   | 3.13         | 7.77       | 59.8                    |
|            | Flash 5   | 2.78         | 13.94      | 84.9                    |
|            | Flash 6   | 3.05         | 11.47      | 84.0                    |

## G.2 Distillation column

Since methanol production is fixed for both processes, and the inlet feed of the distillation column mainly consists in methanol and water at 50/50% mol/mol, the operating conditions of this equipment is similar in both processes, and, therefore, the same dimensions applies for both cases.

In a packed distillation column, the capacity is associated with the column cross-section area (i.e. its diameter), while the separation efficiency is associated with the column height (i.e. the number of theoretical stages). Towler and Sinnott[6] recommend a packing size between 50 and 76 mm if the column diameter is larger than 0.9 m. We chose then carbon steel pall rings with 76 mm packing size, which correspond to a packing factor ( $F_p$ ) of 52 m<sup>-1</sup>.

In order to estimate the required cross-section area, first a stress factor ( $F_{LV}$ ) is calculated:

$$F_{LV} = \frac{\dot{m}_L}{\dot{m}_g} \cdot \sqrt{\frac{\rho_g}{\rho_L}} \quad (\text{S42})$$

Here,  $\dot{m}_L$  and  $\dot{m}_g$  are the liquid and gas mass flow rates (kg·s<sup>-1</sup>),  $\rho_L$  and  $\rho_g$  are the liquid and gas densities (kg·m<sup>-3</sup>).

Towler and Sinnott recommend a pressure drop in packed distillation columns to be between 40 and 80 (mm H<sub>2</sub>O)·(m of packed height)<sup>-1</sup>. Considering a pressure drop around 80 (mm H<sub>2</sub>O)·(m of packed height)<sup>-1</sup>, and a calculated stress factor of 0.059, a constant  $K_4$  of 2.1 is obtained from a generalized pressure drop correlation.[6] The required cross-section area (m<sup>2</sup>) of the column is 39.1 m<sup>2</sup>, which is calculated with following equation: [6]

$$A_c = \dot{m}_g \cdot \sqrt{\frac{13.1 \cdot F_p}{K_4 \cdot \rho_g \cdot (\rho_L - \rho_g)}} \cdot \left(\frac{\mu_L}{\rho_L}\right)^{0.1} \quad (\text{S43})$$

In order to provide the required cross-section area, two columns are proposed, each with a diameter of  $D = 5$  m (combined  $A_c = 39.27$  m<sup>2</sup>). The height the packed columns is estimated by multiplying the number of stages (30) to a height equivalent to a theoretical plate (HETP). A typical value for large packing size of HETP = 1 m is assumed,[6] corresponding to a total column height of 30 m.



### *G.3 Heat exchanger*

The estimation of the required surface area of a heat exchanger ( $A_S$ ) is made considering a global heat transfer coefficient ( $U$ ) and logarithmic mean temperature difference ( $\Delta T_{LM}$ ), as follows:

$$A_S = \frac{\dot{Q}}{U \cdot \Delta T_{LM}} \quad (S44)$$

$$\Delta T_{LM} = \frac{(\Delta T_{hot} - \Delta T_{cold})}{\ln\left(\frac{\Delta T_{hot}}{\Delta T_{cold}}\right)} \quad (S45)$$

Where  $\Delta T_{hot}$  and  $\Delta T_{cold}$  are the inlet/outlet temperature difference of the hot fluid and the cold fluid, respectively, and  $\dot{Q}$  is the heat transfer duty.

The heat transfer coefficient of each heat exchanger ( $U$ ), including the condenser and reboiler of the distillation columns, is selected from the typical values presented in the VDI Atlas,[2] which depend on the conditions of both fluids. In Table S14, the considered coefficients, the heat duties and the surface areas of the heat exchangers are summarized.

**Table S14.** Global heat transfer coefficients, heat transfer duty, and estimated surface area of the heat exchangers of the one-step and the three-step process.

| Process    | Equipment      | $\dot{Q}$ (MW) | $U$ (W·m <sup>-2</sup> ·K <sup>-1</sup> ) | $A_s$ (m <sup>2</sup> ) |
|------------|----------------|----------------|-------------------------------------------|-------------------------|
| One-step   | HE1            | 13.6           | 50                                        | 5800                    |
|            | HE2            | 11.1           | 70                                        | 3610                    |
|            | HE3            | 5.6            | 200                                       | 1160                    |
|            | HE4            | 105.5          | 150                                       | 27270                   |
|            | HE5            | 103.3          | 300                                       | 8520                    |
|            | HE6            | 5.0            | 600                                       | 240                     |
|            | HE7            | 24.2           | 300                                       | 4280                    |
|            | HE8            | 41.8           | 1500                                      | 340                     |
|            | Col. Condenser | 143.6          | 1000                                      | 2360                    |
|            | Col. Reboiler  | 53.7           | 1000                                      | 2580                    |
| Three-step | HE1            | 11.1           | 50                                        | 4730                    |
|            | HE2            | 9.7            | 70                                        | 4280                    |
|            | HE3            | 47.6           | 150                                       | 24060                   |
|            | HE4            | 61.8           | 300                                       | 4940                    |
|            | HE5            | 7.7            | 300                                       | 870                     |
|            | HE6            | 13.0           | 150                                       | 5050                    |
|            | HE7            | 46.3           | 150                                       | 15050                   |
|            | HE8            | 14.3           | 300                                       | 2210                    |
|            | HE9            | 37.9           | 300                                       | 3320                    |
|            | HE10           | 49.7           | 150                                       | 10530                   |
|            | HE11           | 14.8           | 300                                       | 2490                    |
|            | HE12           | 3.2            | 300                                       | 190                     |
|            | HE13           | 8.5            | 1500                                      | 70                      |
|            | HE14           | 31.5           | 1000                                      | 410                     |
|            | Col. Condenser | 143.0          | 1000                                      | 2350                    |
|            | Col. Reboiler  | 56.5           | 1000                                      | 2690                    |

## H. Techno-economic analysis

**Table S15.** Calculation of the Capital Expenses (CAPEX) depending on the total equipment costs (EC).

| Item                                         | Costs                                            |
|----------------------------------------------|--------------------------------------------------|
| <b><i>Direct costs (D)</i></b>               |                                                  |
| Equipment costs (EC)                         | $\sum EC_j$                                      |
| Installation                                 | $0.47 \cdot \sum EC_j$                           |
| Instrumentation controls                     | $0.36 \cdot \sum EC_j$                           |
| Piping                                       | $0.68 \cdot \sum EC_j$                           |
| Electrical systems                           | $0.11 \cdot \sum EC_j$                           |
| Buildings                                    | $0.18 \cdot \sum EC_j$                           |
| Yard improvement                             | $0.10 \cdot \sum EC_j$                           |
| Service facilities                           | $0.55 \cdot \sum EC_j$                           |
| <b><i>Indirect costs (I)</i></b>             |                                                  |
| Engineering & supervision                    | $0.33 \cdot \sum EC_j$                           |
| Construction expenses                        | $0.41 \cdot \sum EC_j$                           |
| Legal expenses                               | $0.4 \cdot \sum EC_j$                            |
| Contractors                                  | $0.05 \cdot (D + I) = 0.2115 \cdot \sum EC_j$    |
| Contingency                                  | $0.10 \cdot (D + I) = 0.4230 \cdot \sum EC_j$    |
| <b><i>Fixed capital investment (FCI)</i></b> | $4.8645 \cdot \sum EC_j$                         |
| <b><i>Working capital (WC)</i></b>           | $0.10 \text{ of CAPEX} = 0.5405 \cdot \sum EC_j$ |
| <b><i>Capital expenses (CAPEX)</i></b>       | $FCI + WC = 5.4050 \cdot \sum EC_j$              |

**Table S16.** Estimation of indirect operating expenses ( $OPEX_{ind}$ ).

| Item                                       | Costs                                                         |
|--------------------------------------------|---------------------------------------------------------------|
| Operating labor ( <b><i>OL</i></b> )       | <i>OL</i>                                                     |
| Operating supervision ( <b><i>OS</i></b> ) | $0.15 \cdot OL$                                               |
| Maintenance labor ( <b><i>ML</i></b> )     | $0.02 \cdot FCI$                                              |
| Maintenance material ( <b><i>MM</i></b> )  | $0.02 \cdot FCI$                                              |
| Operating supplies                         | $0.15 \cdot (ML + MM) = 0.006 \cdot FCI$                      |
| Laboratory charges                         | $0.20 \cdot OL$                                               |
| Insurance and taxes                        | $0.02 \cdot FCI$                                              |
| Plant overhead ( <b><i>PO</i></b> )        | $0.60 \cdot (OL + OS + ML) = 0.69 \cdot OL + 0.012 \cdot FCI$ |
| Administrative costs                       | $0.25 \cdot PO = 0.1725 \cdot OL + 0.003 \cdot FCI$           |
| Distribution & Marketing costs             | $0.06 \cdot NPC$                                              |
| Research & Development                     | $0.04 \cdot NPC$                                              |
| <b><i>Total OPEX<sub>ind</sub></i></b>     | $2.2125 \cdot OL + 0.081 \cdot FCI + 0.10 \cdot NPC$          |

**Table S17.** Equipment characteristic dimensions and equipment costs (EC) of the one-step approach. All equipment is built with carbon steel. All equipment reference price is taken from Peters et al. [7], except for the power generator, whose ref. price is taken from Henning and Haase. [8]

| Equipment ID                                           | Scaling factor | Characteristic capacity                                                                            | Total cost in 2020 (M€) |
|--------------------------------------------------------|----------------|----------------------------------------------------------------------------------------------------|-------------------------|
| <i>Centrifugal compressors and pumps</i>               |                |                                                                                                    |                         |
| CP1-CO2                                                | 0.69           | Power = 11.50 MW                                                                                   | 9.15                    |
| CP2-CO2                                                | 0.69           | Power = 11.16 MW                                                                                   | 8.89                    |
| CP3-CO2                                                | 0.69           | Power = 11.37 MW                                                                                   | 9.06                    |
| CP-H2                                                  | 0.69           | Power = 12.58 MW                                                                                   | 10.02                   |
| CP-REC                                                 | 0.69           | Power = 0.57 MW                                                                                    | 0.52                    |
| Pump                                                   | 0.33           | Volumetric flow rate = $0.044 \text{ m}^3 \cdot \text{s}^{-1}$ ,<br>Discharge pressure = 38.07 bar | 0.11                    |
| <i>Flash drums</i>                                     |                |                                                                                                    |                         |
| FLASH1                                                 | 0.57           | Volume = $124 \text{ m}^3$                                                                         | 0.05                    |
| FLASH2                                                 | 0.57           | Volume = $46 \text{ m}^3$                                                                          | 0.03                    |
| FLASH3                                                 | 0.57           | Volume = $165 \text{ m}^3$                                                                         | 0.05                    |
| FLASH4                                                 | 0.57           | Volume = $116 \text{ m}^3$                                                                         | 0.05                    |
| <i>Fixed-tubed heat exchangers and reactor modules</i> |                |                                                                                                    |                         |
| HE1                                                    | 0.44           | Heat transfer area = $5800 \text{ m}^2$                                                            | 0.52                    |
| HE2                                                    | 0.44           | Heat transfer area = $3610 \text{ m}^2$                                                            | 0.40                    |
| HE3                                                    | 0.44           | Heat transfer area = $1160 \text{ m}^2$                                                            | 0.13                    |
| HE4                                                    | 0.44           | Heat transfer area = $27270 \text{ m}^2$                                                           | 3.01                    |
| HE5                                                    | 0.44           | Heat transfer area = $8520 \text{ m}^2$                                                            | 0.94                    |
| HE6                                                    | 0.44           | Heat transfer area = $240 \text{ m}^2$                                                             | 0.04                    |
| HE7                                                    | 0.44           | Heat transfer area = $4280 \text{ m}^2$                                                            | 0.48                    |
| HE8                                                    | 0.44           | Heat transfer area = $340 \text{ m}^2$                                                             | 0.04                    |
| Reactor (6 units)                                      | 0.44           | Heat transfer area = $48600 \text{ m}^2$                                                           | 32.18                   |

**Table S17.** *(continuation)*

| <b>Equipment ID</b>                                    | <b>Scaling factor</b> | <b>Characteristic capacity</b>                   | <b>Total cost in 2020 (M€)</b> |
|--------------------------------------------------------|-----------------------|--------------------------------------------------|--------------------------------|
| <i>Distillation column (2 units of each equipment)</i> |                       |                                                  |                                |
| Condenser                                              | 0.44                  | Heat transfer area = 2360 m <sup>2</sup>         | 0.43                           |
| Reboiler                                               | 0.60                  | Heat transfer area = 2580 m <sup>2</sup>         | 0.50                           |
| Packed Column                                          | 0.86                  | Diameter = 5 m, Height = 30 m                    | 2.06                           |
| <i>Fired heater and air blower</i>                     |                       |                                                  |                                |
| Fired heater                                           | 0.60                  | Heat duty = 51.00 MW                             | 3.54                           |
| Blower                                                 | 0.616                 | Air flow = 15.36 m <sup>3</sup> ·s <sup>-1</sup> | 0.56                           |
| <i>Steam turbine and power generator</i>               |                       |                                                  |                                |
| Steam Turbine                                          | 0.44                  | Power = 29.82 MW                                 | 1.04                           |
| Generator                                              | 1                     | Power = 29.82 MW                                 | 1.71                           |

**Table S18.** Equipment characteristic dimensions and equipment costs (EC) of the three-step approach. All equipment is built with carbon steel, and the costs include 10% delivery costs. All equipment reference price is taken from Peters et al. [7], except for the power generator, whose ref. price is taken from Henning and Haase. [8]

| Equipment ID                                           | Scaling factor | Characteristic capacity                                                                            | Total cost in 2020 (M€) |
|--------------------------------------------------------|----------------|----------------------------------------------------------------------------------------------------|-------------------------|
| <i>Centrifugal compressors and pumps</i>               |                |                                                                                                    |                         |
| CP1-CO2                                                | 0.69           | Power = 9.94 MW                                                                                    | 7.92                    |
| CP2-CO2                                                | 0.69           | Power = 9.75 MW                                                                                    | 7.77                    |
| CP3-CO2                                                | 0.69           | Power = 9.95 MW                                                                                    | 7.93                    |
| CP-H2                                                  | 0.69           | Power = 12.14 MW                                                                                   | 9.97                    |
| CP-REC                                                 | 0.69           | Power = 0.63 MW                                                                                    | 0.57                    |
| Pump                                                   | 0.33           | Volumetric flow rate = $0.042 \text{ m}^3 \cdot \text{s}^{-1}$ ,<br>Discharge pressure = 45.76 bar | 0.13                    |
| <i>Flash drums</i>                                     |                |                                                                                                    |                         |
| FLASH1                                                 | 0.57           | Volume = $101 \text{ m}^3$                                                                         | 0.05                    |
| FLASH2                                                 | 0.57           | Volume = $38 \text{ m}^3$                                                                          | 0.03                    |
| FLASH3                                                 | 0.57           | Volume = $83 \text{ m}^3$                                                                          | 0.05                    |
| FLASH4                                                 | 0.57           | Volume = $60 \text{ m}^3$                                                                          | 0.04                    |
| FLASH5                                                 | 0.57           | Volume = $85 \text{ m}^3$                                                                          | 0.05                    |
| FLASH6                                                 | 0.57           | Volume = $84 \text{ m}^3$                                                                          | 0.05                    |
| <i>Fixed-tubed heat exchangers and reactor modules</i> |                |                                                                                                    |                         |
| HE1                                                    | 0.44           | Heat transfer area = $4730 \text{ m}^2$                                                            | 0.42                    |
| HE2                                                    | 0.44           | Heat transfer area = $4280 \text{ m}^2$                                                            | 0.48                    |
| HE3                                                    | 0.44           | Heat transfer area = $24060 \text{ m}^2$                                                           | 2.66                    |
| HE4                                                    | 0.44           | Heat transfer area = $4940 \text{ m}^2$                                                            | 0.55                    |
| HE5                                                    | 0.44           | Heat transfer area = $870 \text{ m}^2$                                                             | 0.10                    |
| HE6                                                    | 0.44           | Heat transfer area = $5050 \text{ m}^2$                                                            | 0.56                    |
| HE7                                                    | 0.44           | Heat transfer area = $15050 \text{ m}^2$                                                           | 1.66                    |
| HE8                                                    | 0.44           | Heat transfer area = $2210 \text{ m}^2$                                                            | 0.25                    |
| HE9                                                    | 0.44           | Heat transfer area = $3320 \text{ m}^2$                                                            | 0.37                    |

|      |      |                                           |      |
|------|------|-------------------------------------------|------|
| HE10 | 0.44 | Heat transfer area = 10530 m <sup>2</sup> | 1.17 |
|------|------|-------------------------------------------|------|

**Table S18.** (continuation)

| Equipment ID                                           | Scaling factor | Characteristic capacity                         | Total cost in 2020 (M€) |
|--------------------------------------------------------|----------------|-------------------------------------------------|-------------------------|
| <i>Fixed-tubed heat exchangers and reactor modules</i> |                |                                                 |                         |
| HE11                                                   | 0.44           | Heat transfer area = 2490 m <sup>2</sup>        | 0.28                    |
| HE12                                                   | 0.44           | Heat transfer area = 190 m <sup>2</sup>         | 0.03                    |
| HE13                                                   | 0.44           | Heat transfer area = 70 m <sup>2</sup>          | 0.01                    |
| HE14                                                   | 0.44           | Heat transfer area = 410 m <sup>2</sup>         | 0.05                    |
| Reactor<br>(3 units)                                   | 0.44           | Heat transfer area = 48600 m <sup>2</sup>       | 16.09                   |
| <i>Distillation column (2 units of each equipment)</i> |                |                                                 |                         |
| Fixed-tubed<br>Condenser                               | 0.44           | Heat transfer area = 2350 m <sup>2</sup>        | 0.43                    |
| U-tubed<br>Reboiler                                    | 0.60           | Heat transfer area = 2690 m <sup>2</sup>        | 0.52                    |
| Packed Column                                          | 0.86           | Diameter = 5 m, Height = 30 m                   | 2.06                    |
| <i>Fired heater and air blower</i>                     |                |                                                 |                         |
| Fired Heater                                           | 0.60           | Heat duty = 21.80 MW                            | 1.70                    |
| Blower                                                 | 0.616          | Air flow = 6.01 m <sup>3</sup> ·s <sup>-1</sup> | 0.22                    |
| <i>Steam turbine and power generator</i>               |                |                                                 |                         |
| Steam Turbine                                          | 0.44           | Power = 20.84 MW                                | 0.74                    |
| Generator                                              | 1              | Power = 20.84 MW                                | 1.19                    |



**Table S19.** Detailed operating expenditures (OPEX) of the one-step and the three-step approach.

| Item                                                  | Process Requirements      |                           | Costs (M€·a <sup>-1</sup> ) |              |
|-------------------------------------------------------|---------------------------|---------------------------|-----------------------------|--------------|
|                                                       | One-Step                  | Three-Step                | One-Step                    | Three-Step   |
| <b><i>Direct OPEX</i></b>                             |                           |                           | <b>874.94</b>               | <b>839.6</b> |
| Hydrogen                                              | 31.1 ton·h <sup>-1</sup>  | 30.0 ton·h <sup>-1</sup>  | 769.50                      | 742.51       |
| Carbon dioxide                                        | 211.7 ton·h <sup>-1</sup> | 204.3 ton·h <sup>-1</sup> | 74.93                       | 72.30        |
| Cooling water                                         | 38490 ton·h <sup>-1</sup> | 34645 ton·h <sup>-1</sup> | 0.38                        | 0.35         |
| Clean water                                           | 1.46 ton·h <sup>-1</sup>  | 1.38 ton·h <sup>-1</sup>  | 0.02                        | 0.02         |
| Total organic carbon (TOC) abatement of process water | 7.75 kg·h <sup>-1</sup>   | 5.72 kg·h <sup>-1</sup>   | 0.12                        | 0.09         |
| Electricity                                           | 17.6 MW                   | 21.83 MW                  | 12.66                       | 15.72        |
| Catalyst (Cu/ZnO/Al <sub>2</sub> O <sub>3</sub> )     | 956.2 ton·a <sup>-1</sup> | 478.1 ton·a <sup>-1</sup> | 17.31                       | 8.65         |
| <b><i>Indirect OPEX</i></b>                           |                           |                           | <b>142.08</b>               | <b>128.6</b> |
| Operating labor (OL)                                  | 16 operators              | 16 operators              | 1.15                        | 1.15         |
| Operating supervision (OS)                            |                           |                           | 0.17                        | 0.17         |
| Maintenance labor (ML)                                |                           |                           | 8.06                        | 6.23         |
| Maintenance material (MM)                             |                           |                           | 8.06                        | 6.23         |
| Operating supplies                                    |                           |                           | 2.42                        | 1.87         |
| Laboratory charges                                    |                           |                           | 0.23                        | 0.23         |
| Insurances and taxes                                  |                           |                           | 8.06                        | 6.23         |
| Plant overhead (PO)                                   |                           |                           | 5.63                        | 4.53         |
| Administrative Costs                                  |                           |                           | 1.41                        | 1.13         |
| Distribution & Marketing Costs                        |                           |                           | 64.13                       | 60.50        |
| Research & Development                                |                           |                           | 42.75                       | 40.33        |

## References

1. Goos, E.; Burcat, A.; Ruscic, B. New NASA thermodynamic polynomials database. Available at: <http://garfield.chem.elte.hu/Burcat/THERM.DAT> (Access in Mar. 2022. Available online: (accessed on
2. *VDI Heat Atlas*, 2nd ed.; Springer: Berlin-Heidelberg, 2010; pp. 1585p.
3. Gruber, M. Detaillierte Untersuchung des Wärme und Stofftransports in einem Festbett-Methanisierungsreaktor für Power-to-Gas Anwendungen. . *PhD Thesis*, 275 p. Faculty of Chemical and Process Engineering, Karlsruhe Institute of Technology (KIT), Germany **2019**.
4. Lacerda de Oliveira Campos, B.; Herrera Delgado, K.; Pitter, S.; Sauer, J. Development of Consistent Kinetic Models Derived from a Microkinetic Model of the Methanol Synthesis. *Industrial & Engineering Chemistry Research* **2021**, 10.1021/acs.iecr.1c02952, doi:10.1021/acs.iecr.1c02952.
5. Burners for Fired Heaters in General Refinery Services. In *Reference Practice (RP) 535*, 3rd ed.; American Petroleum Institute (API): 2014.
6. Towler, G.; Sinnott, R. *Chemical Engineering Design - Principles, Practice and Economics of Plant and Process Design*, 2nd ed.; Elsevier: 2013.
7. Peters, M.S.; Timmerhaus, K.D.; West, R.E. *Plant Design and Economics for Chemical Engineers*, 5th ed.; McGraw-Hill Education Ltd: Boston, 2002; pp. 1008.
8. Hennig, M.; Haase, M. Techno-economic analysis of hydrogen enhanced methanol to gasoline process from biomass-derived synthesis gas. *Fuel Processing Technology* **2021**, 216, 106776, doi:<https://doi.org/10.1016/j.fuproc.2021.106776>.
